# Supplementary material for: Cohort study of healthcare use, costs and diagnoses from onset to 6 months after discharge for takotsubo syndrome in Sweden
Source: PubMed Central journal article supplement — BMJ Open. 2019 Mar 1;9(2):e027814. doi: 10.1136/bmjopen-2018-027814 (PMC6398620; doi:10.1136/bmjopen-2018-027814), 2019-03-01
Supplement: bmjopen-2018-027814.draft_revisions.pdf [file bmjopen-2018-027814.draft_revisions.pdf]

# BMJ Open

BMJ Open is committed to open peer review. As part of this commitment we make the peer review history of every article we publish publicly available.

When an article is published we post the peer reviewers' comments and the authors' responses online. We also post the versions of the paper that were used during peer review. These are the versions that the peer review comments apply to.

The versions of the paper that follow are the versions that were submitted during the peer review process. They are not the versions of record or the final published versions. They should not be cited or distributed as the published version of this manuscript.

BMJ Open is an open access journal and the full, final, typeset and author-corrected version of record of the manuscript is available on our site with no access controls, subscription charges or pay-per-view fees (<http://bmjopen.bmj.com>).

If you have any questions on BMJ Open's open peer review process please email [info.bmjopen@bmj.com](mailto:info.bmjopen@bmj.com)

# BMJ Open

## A cohort study of health care use, costs and diagnoses from onset to 6 months after discharge for takotsubo syndrome in Sweden

|                               |                                                                                                                                                                                                                                                                                                                                                                                                                                                                                                                                                                                                                                                                                                                                                                                                                                                                                                                                                                                                                                 |
|-------------------------------|---------------------------------------------------------------------------------------------------------------------------------------------------------------------------------------------------------------------------------------------------------------------------------------------------------------------------------------------------------------------------------------------------------------------------------------------------------------------------------------------------------------------------------------------------------------------------------------------------------------------------------------------------------------------------------------------------------------------------------------------------------------------------------------------------------------------------------------------------------------------------------------------------------------------------------------------------------------------------------------------------------------------------------|
| Journal:                      | <i>BMJ Open</i>                                                                                                                                                                                                                                                                                                                                                                                                                                                                                                                                                                                                                                                                                                                                                                                                                                                                                                                                                                                                                 |
| Manuscript ID                 | bmjopen-2018-027814                                                                                                                                                                                                                                                                                                                                                                                                                                                                                                                                                                                                                                                                                                                                                                                                                                                                                                                                                                                                             |
| Article Type:                 | Research                                                                                                                                                                                                                                                                                                                                                                                                                                                                                                                                                                                                                                                                                                                                                                                                                                                                                                                                                                                                                        |
| Date Submitted by the Author: | 08-Nov-2018                                                                                                                                                                                                                                                                                                                                                                                                                                                                                                                                                                                                                                                                                                                                                                                                                                                                                                                                                                                                                     |
| Complete List of Authors:     | Wallström, Sara; Institute of Health and Care Sciences, Sahlgrenska Academy, University of Gothenburg; University of Gothenburg Centre for Person-Centred Care, Sahlgrenska Academy, University of Gothenburg Ekman, Inger; Institute of Health and Care Sciences, Sahlgrenska Academy, University of Gothenburg; University of Gothenburg Centre for Person-Centred Care, Sahlgrenska Academy, University of Gothenburg Omerovic, Elmir; Department of Cardiology, Sahlgrenska University Hospital; Department of Molecular and Clinical Medicine, Sahlgrenska Academy, University of Gothenburg Ulin, Kerstin; Institute of Health and Care Sciences, Sahlgrenska Academy, University of Gothenburg; University of Gothenburg Centre for Person-Centred Care, Sahlgrenska Academy, University of Gothenburg Gyllensten, Hanna ; Institute of Health and Care Sciences, Sahlgrenska Academy, University of Gothenburg; University of Gothenburg Centre for Person-Centred Care , Sahlgrenska Academy, University of Gothenburg |
| Keywords:                     | CARDIOLOGY, HEALTH ECONOMICS, Health economics < HEALTH SERVICES ADMINISTRATION & MANAGEMENT, Adult cardiology < CARDIOLOGY, Heart failure < CARDIOLOGY, Cardiomyopathy < CARDIOLOGY                                                                                                                                                                                                                                                                                                                                                                                                                                                                                                                                                                                                                                                                                                                                                                                                                                            |
|                               |                                                                                                                                                                                                                                                                                                                                                                                                                                                                                                                                                                                                                                                                                                                                                                                                                                                                                                                                                                                                                                 |

SCHOLARONE™  
Manuscripts

# A cohort study of health care use, costs and diagnoses from onset to 6 months after discharge for takotsubo syndrome in Sweden

Sara Wallström<sup>1,2</sup>, Inger Ekman<sup>1,2</sup>, Elmir Omerovic<sup>3</sup>, Kerstin Ulin<sup>1,2</sup>, Hanna Gyllensten<sup>1,2</sup>

<sup>1</sup>Institute of Health and Care Sciences, Sahlgrenska Academy, University of Gothenburg, Box 457, 405 30 Gothenburg, Sweden

<sup>2</sup>University of Gothenburg Centre for Person-Centred Care (GPCC), Sahlgrenska Academy, University of Gothenburg, Box 457, 405 30 Gothenburg, Sweden

<sup>3</sup>Department of Cardiology, Sahlgrenska University Hospital, 413 45 Gothenburg, Sweden  
Department of Molecular and Clinical Medicine, The Wallenberg Laboratory, Sahlgrenska Academy, University of Gothenburg, 413 45 Gothenburg, Sweden

Corresponding author: Sara Wallström, Institute of Health and Care Sciences, Sahlgrenska Academy, University of Gothenburg, Box 457, 405 30 Gothenburg, Sweden

Telephone: +46(0)31-786 60 79. Fax: +46(0)31-786 60 50

E-mail: [sara.wallstrom@gu.se](mailto:sara.wallstrom@gu.se)

**Word count:** 3684

## ABSTRACT

**Objective:** Little is known about the economic impact of takotsubo syndrome (TS) in patients after their initial discharge from hospital. Therefore, this study aimed to describe the use of health care resources and calculate direct health care costs for TS from hospitalisation to 6 months after discharge. We also explored the distribution of costs between TS and other diagnoses in patients with TS.

**Method, participants and setting:** Cohort study investigating direct health care costs from hospitalisation, specialised outpatient care and primary care. Information on use of care resources during 6 months after diagnosis of TS was collected for 58 consecutive patients from the Regional Patient Register. Incidence-based direct health care costs, in 2015 values, were calculated using diagnosis-related group weights and unit costs from national statistics on health care costs.

**Results:** The mean length of hospital stay was 10.2 days, index 6.4 days and readmissions 3.8 days. The mean number of follow-up encounters per patient was 15.6, of which two thirds were specialised outpatient care and one third primary care, resulting in an average cost of EUR 10,360. Of this cost, costs of EUR 8,026 (77.5%) occurred during encounters for which at least one of the registered conditions was cardiovascular. Costs differed little according to background characteristics.

**Conclusion:** This study shows that patients use hospital care, specialised outpatient care and primary care after discharge for TS. Most direct health care costs relate to cardiac diagnoses. Patients with TS would likely benefit from a supportive follow-up programme after discharge from hospital.

## KEY WORDS

- CARDIOLOGY
- HEALTH ECONOMICS
- Health economics < HEALTH SERVICES ADMINISTRATION & MANAGEMENT
- Adult cardiology < CARDIOLOGY
- Heart failure < CARDIOLOGY

## STRENGTHS AND LIMITATIONS

- This study explores an under-investigated area, namely cost of illness and health economics in patients with takotsubo syndrome.
- Register offered the opportunity to investigate direct health care costs from inpatient, specialised outpatient care and primary care.
- This study provides insight on the distribution of costs in patients with takotsubo syndrome.
- Limitations include a small sample size and that the data were limited to direct health care costs.

## 54 INTRODUCTION

55 Takotsubo syndrome (TS) is an acute reversible heart failure that usually recovers spontaneously in  
56 12 weeks from time of onset. Its clinical presentation at onset has similar features to those of an  
57 acute myocardial infarction (AMI) with chest pain, dyspnoea, ECG changes and raised markers of  
58 myocardial necrosis.<sup>1,2</sup> TS is characterised by regional wall motion abnormalities affecting one or  
59 both ventricles of the heart and absence of flow-limiting lesions in coronary arteries. The  
60 pathophysiological mechanisms underlying TS are not fully understood, but a surge of the hormone  
61 catecholamines is believed to play a vital role. Onset is often preceded by a stressful event, either  
62 psychological or physical.<sup>2</sup>

63 TS is most common in postmenopausal women: 84–91% of cases are female and the mean age varies  
64 between 63 and 76 years.<sup>3-5</sup> Knowledge about potential risk factors is scarce, but smoking,  
65 hyperlipidemia, alcohol abuse and anxiety have been acknowledged.<sup>6</sup> Because of a lack of diagnosis  
66 uniformity, it has been difficult to determine the exact number of TS cases per annum; however,  
67 estimates suggest that there are 50–100,000 cases per year in the USA and a similar number in  
68 Europe.<sup>2</sup> There are no reliable figures for Sweden, but an estimation based on the population would  
69 be 1,500–3,000 cases per annum in Sweden. This figure is in accordance with the estimation of 2,000  
70 cases per annum in Sweden from the Swedish Coronary Angiography and Angioplasty Registry  
71 (SCAAR).<sup>7</sup>

72 TS was previously assumed to be relatively benign and have little impact on long-term survival.  
73 However, recent studies have shown that TS affects both short- and long-term survival, which is  
74 comparable to, or worse than, survival in patients affected by AMI.<sup>4,8</sup> Mortality from cardiovascular  
75 causes is comparable between these groups, but the excess mortality in patients with TS is related to  
76 noncardiovascular or unknown causes. Male sex, Killip class III or IV at admission according to  
77 classification for heart failure and diabetes mellitus increase the likelihood of mortality in patients  
78 with TS.<sup>8</sup>

1  
2  
3 79 There are currently few guidelines for care or follow-up for patients with TS. At hospital,  
4  
5 80 investigations often include coronary angiography, ultra-cardiogram and cardiac biomarkers.  
6  
7 81 Treatment is primarily aimed at supportive care to sustain life and minimise complications during the  
8  
9 82 recovery of normal cardiac function. At least one follow-up visit is arranged with a specialist after  
10  
11 83 discharge from hospital to review medication and confirm recovery of cardiac function.<sup>2</sup> Little is  
12  
13 84 known of health care resources used for this follow-up. To our knowledge, there are only two  
14  
15 85 published studies examining costs after TS, both conducted in the same American setting. These  
16  
17 86 studies calculated the average cost of hospital stay for patients with TS to USD 16,723 in 2007–2011<sup>9</sup>  
18  
19 87 and the total average charges to USD 61,034 in 2006–2010 for TS patients without arrhythmias<sup>10</sup>  
20  
21 88 (concurrent arrhythmias may increase the average inpatient charge by USD 11,334<sup>10</sup>).  
22  
23  
24  
25  
26 89 Apparently, there are no studies on the use of health care resources for TS from Europe, a healthcare  
27  
28 90 system that, in many aspects, is different from that in the US. In addition, little is known about the  
29  
30 91 economic impact of TS for patients and for the healthcare system after initial discharge from  
31  
32 92 hospital. Such studies, often called cost of illness (COI) studies, describe the economic burden of  
33  
34 93 disease on society. They are useful to compare the burden of a disease on the healthcare system,  
35  
36 94 compare TS to other diseases and to identify important costs and variation in costs in the treatment  
37  
38 95 of a specific disease (such as TS).<sup>11</sup> Therefore, the primary aim of this study was to describe the use of  
39  
40 96 health care resources and calculate direct health care costs for TS from hospitalisation to 6 months  
41  
42 97 after discharge. A secondary aim was to explore the distribution of costs between TS and other  
43  
44 98 diagnoses in patients with TS.  
45  
46  
47  
48  
49

## 50 99 **METHODS**

### 54 100 **Study population and settings**

57 101 Patients from two hospitals in a city in western Sweden were included consecutively from January  
58  
59 102 2012 to October 2015. There is no specific code in the Swedish version of the ICD International  
60

1  
2  
3 103 Statistical Classification of Diseases and Related Health Problems, tenth revision (ICD-10).  
4  
5 104 Consequently, all coronary angiography records from the participating hospitals were screened to  
6  
7 105 identify patients with TS. Patients were included after identification with coronary angiography and  
8  
9 106 confirmation of the diagnosis by a cardiologist. The inclusion criteria were (1) having a diagnosis of  
10  
11 107 TS, (2) speaking and reading Swedish, (3) having a predicted survival of more than 6 months and (4)  
12  
13 108 living in the Västra Götaland region. In total, 110 patients with TS were identified during the study  
14  
15 109 period; of those, 29 declined participation, 10 had a predicted survival of <6 months, 5 did not speak  
16  
17 110 Swedish or were otherwise unable to fill out the questionnaires, 2 participated in another  
18  
19 111 incompatible research study, 2 died and 4 accepted participation but were excluded because they did  
20  
21 112 not live in the region of Västra Götaland and were thus not included in the Regional Patient Register  
22  
23 113 (VEGA). The remaining 58 (53%) patients with TS were included in the study.  
24  
25  
26  
27

## 28 114 **Data collection**

29  
30  
31  
32 115 Clinical information about the disease and potential risk factors (e.g., history of cardiovascular  
33  
34 116 disease, nicotine use, Killip class and hypertension) were retrieved from medical records during the  
35  
36 117 initial hospital stay. Data on socioeconomic factors were collected from each participant using a  
37  
38 118 questionnaire. Register data about the consumption of health care resources and its cost were  
39  
40 119 obtained from the Regional Patient Register (VEGA), which contains information about all inpatient  
41  
42 120 care, specialised outpatient care and primary care in the Västra Götaland region. The VEGA database  
43  
44 121 has near full coverage of care used by the residents of the region.<sup>12 13</sup> Costs for medications and  
45  
46 122 health care services provided by the municipalities were not included. Patient information retrieved  
47  
48 123 covered the period from the day patients were admitted to hospital for TS and the following 6  
49  
50 124 months. Health care encounters were classified based on the main diagnosis registered (according to  
51  
52 125 the ICD-10 guidelines) as chapters A-Z and using a more detailed level for categorising disorders  
53  
54 126 within chapter I (Circulatory system disorders).  
55  
56  
57  
58  
59  
60



1  
2  
3 127 Incidence-based direct health care costs were calculated for consecutive patients, including costs for  
4  
5 128 use of health care resources during a 6-month period starting at diagnosis of TS for each patient.  
6  
7 129 Both all-cause costs and costs for resource use, for which cardiovascular causes were the main  
8  
9 130 diagnosis, were calculated. Calculations were made based on the economic perspective of the  
10  
11 131 healthcare sector (in 2015 values). Costs for specialised health care were calculated using diagnosis-  
12  
13 132 related group (DRG) weights retrieved from VEGA.<sup>14</sup> Costs calculated from DRG weights were  
14  
15 133 updated to 2015 values using the Swedish healthcare inflation index, which is a price index for the  
16  
17 134 counties.<sup>15</sup> Primary care encounters were assigned unit costs based on national statistics for health  
18  
19 135 care use and costs.<sup>16</sup> As per national statistics, the cost for primary care physician visits was SEK  
20  
21 136 1,397 (EUR 149) in 2014; this cost was updated to the 2015 values using the Swedish healthcare  
22  
23 137 inflation index. A visit to other health care personnel was weighted as 40% of the cost of a physician  
24  
25 138 visit; phone calls were weighted as one-third of the cost of a visit; and home health care as twice the  
26  
27 139 cost of a visit.<sup>16</sup> Length of stay in hospital is recorded for each hospital in the registry and therefore  
28  
29 140 transfers between hospitals are registered as readmissions. Indirect costs resulting from lost  
30  
31 141 productivity and intangible costs related to harm and suffering were not included in the analyses.  
32  
33 142 For two participants, information about index hospitalisation was not obtained from VEGA. Data for  
34  
35 143 these participants were requested a second time to eliminate errors in the database extraction  
36  
37 144 process but no data could be obtained. Instead, length of hospital stay and diagnosis were identified  
38  
39 145 through electronic medical records. The cost was calculated based on the median cost per day for  
40  
41 146 the other participants' index hospitalisation multiplied by the number of days in hospital identified  
42  
43 147 from the medical records. Correct register data for follow-up visits were obtained for both patients.  
44  
45 148 Costs in EUR and USD were calculated using the average exchange rate in 2015 (EUR 1 = SEK 9.3562,  
46  
47 149 USD 1 = SEK 8.435).<sup>17</sup>  
48  
49  
50  
51  
52  
53  
54  
55  
56  
57  
58  
59  
60

## 150 **Analyses**

151 Descriptive statistics were used to explore the clinical information and background characteristics of  
152 the study population. Quantities and direct health care costs were calculated by type of resource  
153 used and diagnoses. Because of the expected skewed distribution of costs, confidence intervals for  
154 costs were calculated with the bootstrap method (using 1000 iterations, seed 1234).<sup>18</sup> For the  
155 baseline clinical data, SPSS v. 22 (IBM Corp., Armonk, NY, USA) was used. For the register data,  
156 statistical analyses were performed using Stata SE 14.2 (Stata Corp, College Station, TX, USA).

## 157 **Patient and Public Involvement**

158 The public or the patients were not directly involved in this study.

## 159 **ETHICS**

160 The study was approved by the Regional Ethical Review Board in Gothenburg (approval reference  
161 numbers: Dnr 275-11, T693-11 and T392-15) and complies with the declaration of Helsinki. Written  
162 informed consent was obtained from all participants.

## 163 **RESULTS**

164 Of the 58 patients included, 53 (91.4%) were women and 5 (8.6%) men (Table 1). In total, the 58  
165 patients with TS were hospitalised for 593 days during the study period, which equals a mean of 10.2  
166 days per person. The length of stay of the baseline hospitalisations was, on average, 6.4 days  
167 (interquartile range: 2–8). In addition, 20 of the 58 patients were readmitted 40 times during the 6-  
168 month study period (median 2 readmissions per readmitted patient, range 1-5). Eleven of these  
169 patients were readmitted during the first 30 days. There was a total of 18 readmissions during the  
170 first 30 days and 10 of these had registered conditions belonging to Circulatory system diseases  
171 (chapter I) in the ICD-10. The hospitalisations of eight people (13 readmissions within 30 days) had a

1  
2  
3 172 main diagnosis in the ICD subchapters I42-I429 (Cardiomyopathy), where TS is usually registered. An  
4  
5 173 additional three readmissions were for Circulatory system disorders (main diagnosis). During the 6-  
6  
7 174 month study period, 19 readmissions were for Circulatory system disorders (main diagnosis) and 13  
8  
9  
10 175 for the ICD subchapters I42-I429 (Cardiomyopathy). A further two readmissions were for unexplained  
11  
12 176 chest pain (R074).

13  
14  
15 177 For the 58 patients with TS, the mean number of follow-up encounters per patient was 15.6 during  
16  
17 178 the 6 months following discharge for TS. This figure includes all categories of health care  
18  
19 179 professionals, both direct and indirect (e.g., telephone contact, writing letters, etc.) encounters and  
20  
21 180 visits at specialist outpatient clinics and primary care. The most common form of outpatient care  
22  
23 181 used was physician visits, followed by physiotherapist or occupational therapist visits, which include  
24  
25 182 cardiac rehabilitation groups, and registered nurse (RN) visits. Other visits in outpatient care included  
26  
27 183 visits to a social counsellor, biomedical analyst, audiologist, assistant nurse and psychologist. In  
28  
29 184 primary care visits with physicians were also most common but RN visits were next most common in  
30  
31 185 this care setting. Other visits in primary care included visits to a social counsellor, assistant nurse,  
32  
33 186 podiatrist and psychologist.

34  
35  
36  
37  
38 187 When dividing costs by care level (Table 2), most costs were associated with index hospitalisation  
39  
40 188 (EUR 260,623), followed by hospital readmissions (EUR 169,739), outpatient care (EUR 143,911) and  
41  
42 189 primary care (EUR 26,602). The average cost per index hospitalisation and readmissions were almost  
43  
44 190 the same: EUR 4,494 and 4,243, respectively. The total cost for outpatient and primary care for the  
45  
46 191 58 patients during the 6-month follow-up post-discharge for TS was EUR 170,514.

47  
48  
49  
50 192 For this sample, there was no clear pattern of costs based on socioeconomic factors, previous disease  
51  
52 193 or risk factors, although there is a higher, though statistically nonsignificant, mean cost in certain age  
53  
54 194 groups and among men (Table 3). Because only five men participated in the study, further division  
55  
56 195 based on sex was deemed unreliable.

1  
2  
3 196 The mean direct health care costs during the 6-month study period was EUR 10,360 (95% confidence  
4  
5 197 interval (CI): EUR 8,310–12,409) in the 58 patients with TS. Of these direct health care costs, costs of  
6  
7 198 EUR 8,026 (77.5%) occurred during health care encounters for which at least one of the registered  
8  
9 199 conditions was in ICD chapter IX (I00–I99 Circulatory system diseases). Costs of EUR 7,135 (68.9% of  
10  
11 200 all costs) were for health care encounters in which the main condition was in ICD chapter IX.

12  
13  
14  
15 201 During the study period, TS was found in ICD I42-I429, which was also the subchapter with the  
16  
17 202 highest costs of all ICD chapters analysed based on the main diagnosis of health care encounters  
18  
19 203 (Table 4). Analysing costs by main diagnosis, other ICD chapters with high costs were I209, I200, I21-  
20  
21 204 I219 and I5-I599. In addition to Circulatory system diseases, the highest costs among TS patients  
22  
23 205 were in the ICD chapter Mental and behavioural disorders, Respiratory system disorders and in the  
24  
25 206 ICD chapter Factors influencing health status and contacts with health services.  
26  
27  
28  
29  
30  
31  
32  
33  
34  
35  
36  
37  
38  
39  
40  
41  
42  
43  
44  
45  
46  
47  
48  
49  
50  
51  
52  
53  
54  
55  
56  
57  
58  
59  
60

**Table 1 Sociodemographic and disease characteristics among 58 patients diagnosed with TS.**

|                                           | Patients with TS<br>n=58 |
|-------------------------------------------|--------------------------|
| Women (%)                                 | 53 (91.4)                |
| Age, median (range)                       | 67.6 (39-86)             |
| Marital status <sup>a</sup>               |                          |
| Married/co-habitant (%)                   | 31 (54.4)                |
| Single (%)                                | 5 (8.8)                  |
| Divorced (%)                              | 12 (21.1)                |
| Widow/widower (%)                         | 9 (15.8)                 |
| Education <sup>a</sup>                    |                          |
| Primary and secondary (%)                 | 33 (57.9)                |
| High (%)                                  | 24 (41.4)                |
| Country of birth, Sweden <sup>a</sup> (%) | 49 (86.0)                |
| Nicotine use <sup>b</sup>                 |                          |
| Current (%)                               | 11 (21,2)                |
| Previous (%)                              | 19 (34,6)                |
| Cardiovascular disease history            |                          |
| Previous AMI (%) <sup>c</sup>             | 6 (11.1)                 |
| Previous stroke (%) <sup>d</sup>          | 3 (5,4)                  |
| Previous angina (%) <sup>a</sup>          | 2 (3,6)                  |
| Diabetes mellitus (%) <sup>d</sup>        | 3 (5,4)                  |
| Hypertension (%) <sup>a</sup>             | 31 (54,4)                |
| Killip class <sup>a</sup>                 |                          |
| I                                         | 40 (70,2)                |
| II                                        | 13 (22,8)                |
| III                                       | 4 (7,0)                  |
| IV                                        | 0(0)                     |

<sup>a</sup> 1 missing<sup>b</sup> 6 missing<sup>c</sup> 4 missing<sup>d</sup> 2 missing

AMI = acute myocardial infarction, TS = Takotsubo syndrome.

Table 2 Distribution of health care encounters and costs after diagnosis of TS by type of health care provider.

| Type of health care provider                                   | Inpatient care |                        |                           | Outpatient care |                        |                           | Primary care |               |                           | All care                                  |                          |                           |
|----------------------------------------------------------------|----------------|------------------------|---------------------------|-----------------|------------------------|---------------------------|--------------|---------------|---------------------------|-------------------------------------------|--------------------------|---------------------------|
|                                                                | No.            | Unit cost EUR (95%CI)  | Total cost EUR (% of all) | No.             | Unit cost EUR (95%CI)  | Total cost EUR (% of all) | No.          | Unit cost EUR | Total cost EUR (% of all) | No.                                       | Average cost per patient | Total cost EUR (% of all) |
| Physician, visit                                               |                |                        |                           | 214             | 282<br>(243-320)       | 60,295 (10.0)             | 109          | 149           | 16,275 (2.7)              | 323                                       | 1,320                    | 76,570<br>(12.7)          |
| Physician, indirect encounter                                  |                |                        |                           | 5               | 0 <sup>b</sup>         | 0                         | 16           | 50            | 796 (0.1)                 | 21                                        | 14                       | 796 (0.1)                 |
| Registered nurse, visit                                        |                |                        |                           | 119             | 255<br>(225-285)       | 30,389 (5.1)              | 93           | 58            | 5,368 (0.9)               | 212                                       | 616                      | 35,757<br>(6.0)           |
| Physiotherapist and occupational therapist, visit              |                |                        |                           | 191             | 87<br>(82-93)          | 16,707 (2.8)              | 19           | 46            | 875 (0.1)                 | 210                                       | 303                      | 17,582<br>(2.9)           |
| Physiotherapist and occupational therapist, indirect encounter |                |                        |                           |                 |                        |                           | 26           | 46            | 1,198 (0.2)               | 26                                        | 21                       | 1,198<br>(0.2)            |
| Other visit                                                    |                |                        |                           | 67              | 123<br>(99-147)        | 8,244 (1.4)               | 35           | 60            | 2,090 (0.3)               | 112                                       | 178                      | 10,334<br>(1.7)           |
| Hospitalisation                                                | 98             | 4,391<br>(3,743-5,040) | 430,362 (71.6)            |                 |                        |                           |              |               |                           | 98                                        | 7,420                    | 418,840<br>(71.6)         |
| Index admission <sup>a</sup>                                   | 58             | 4,494<br>(4,134-4,853) | 260,623 (43.4)            |                 |                        |                           |              |               |                           | 58                                        | 4,494                    | 249,101<br>(43.4)         |
| Readmission                                                    | 40             | 4,243<br>(2,724-5,763) | 169,739 (28.2)            | 8               | 3,535<br>(2,893-4,176) | 28,276 (4.7)              |              |               |                           | 48                                        | 3,418                    | 198,015<br>(33.0)         |
| <b>Total cost</b>                                              | <b>98</b>      |                        | <b>430,362 (71.6)</b>     | <b>604</b>      |                        | <b>143,911 (24.0)</b>     | <b>298</b>   |               | <b>26,602 (4.4)</b>       | <b>904<sup>c</sup><br/>98<sup>d</sup></b> | <b>10,360</b>            | <b>600,876 (100)</b>      |

Number of encounters and mean unit costs by cost components among 58 patients during the 6 months after diagnosis of TS.

<sup>a</sup>Data missing for two patients. Cost was calculated based on length of stay and median cost per day for the other participants' index hospitalisation

<sup>b</sup>Zero cost assigned because of lack of both registered diagnosis and diagnosis-related group.

<sup>c</sup>Outpatient and primary care contacts

<sup>d</sup>Hospitalisations

TS = Takotsubo syndrome

Table 3: Mean direct health care costs after diagnosis of TS by patient characteristics.

| Patient characteristic                     | No.<br>N = 58 | Mean cost<br>EUR (95% CI)    |
|--------------------------------------------|---------------|------------------------------|
| Sex                                        |               |                              |
| Women                                      | 53            | 9,907 (7,815-11,999)         |
| Men                                        | 5             | 15,161 (6,268-24,054)        |
| Age                                        |               |                              |
| <65 years                                  | 20            | 9,711 (6,446-12,976)         |
| 65-75 years                                | 24            | 11,724 (8,167-15,282)        |
| ≥75 years                                  | 14            | 8,948 (6,142-11,754)         |
| Country of birth <sup>a</sup>              |               |                              |
| Sweden                                     | 49            | 10,426 (8,336-12,517)        |
| Other                                      | 8             | 10,071 (3,381-16,762)        |
| Education <sup>a</sup>                     |               |                              |
| Upper secondary school                     | 33            | 11,296 (8,301-14,291)        |
| Post-secondary school                      | 24            | 9,112 (6,262-11,962)         |
| Nicotine use <sup>b</sup>                  |               |                              |
| No current or previous use                 | 22            | 9,256 (6,153-12,359)         |
| Current or previous use                    | 30            | 10,611 (8,015-13,206)        |
| Disease history <sup>a</sup>               |               |                              |
| Previous heart attack, angina or stroke    | 10            | 9,480 (6,134-12,825)         |
| No previous heart attack, angina or stroke | 47            | 10,651 (8,298-13,005)        |
| Comorbidity <sup>a</sup>                   |               |                              |
| Hypertension                               | 31            | 9,860 (7,388-12,331)         |
| No hypertension                            | 26            | 10,969 (7,556-14,383)        |
| <b>Total</b>                               | <b>58</b>     | <b>10,360 (8,310-12,409)</b> |

<sup>a</sup>1 missing<sup>b</sup>6 missing

TS = Takotsubo syndrome

Table 4 Total costs for health care encounters in 58 patients categorised by main conditions for each encounter during 6 months after diagnosis of TS.

| ICD chapter and subchapter <sup>a</sup>                                                                   | Costs by chapters |                            | Costs by subchapters <sup>b</sup> |                            |
|-----------------------------------------------------------------------------------------------------------|-------------------|----------------------------|-----------------------------------|----------------------------|
|                                                                                                           | Total cost        | Mean cost<br>per encounter | Total cost                        | Mean cost<br>per encounter |
|                                                                                                           | EUR               | EUR (95% CI)               | EUR                               | EUR (95% CI)               |
| I Certain infectious and parasitic diseases (A00-B99)                                                     | 448               | 149 (-)                    |                                   |                            |
| II Neoplasms (C00-D48)                                                                                    | 25,557            | 1,065 (4-2,126)            |                                   |                            |
| III Blood and blood-forming organ diseases and certain disorders involving the immune mechanism (D50-D89) | 207               | 104 (38-169)               |                                   |                            |
| IV Endocrine, nutritional and metabolic diseases (E00-E90)                                                | 6,599             | 347 (11-684)               |                                   |                            |
| V Mental and behavioural disorders (F00-F99)                                                              | 36,206            | 647 (-197-1,490)           |                                   |                            |
| VI Nervous system diseases (G00-G99)                                                                      | 5,980             | 460 (216-704)              |                                   |                            |
| VII Eye and adnexa diseases (H00-H59)                                                                     | 1,088             | 109 (44-174)               |                                   |                            |
| VIII Ear and mastoid process diseases (H60-H95)                                                           | 739               | 246 (169-324)              |                                   |                            |
| IX Circulatory system diseases (I00-I99)                                                                  | 413,841           | 1,019 (823-1,215)          |                                   |                            |
| IX 3 (I1-I159)                                                                                            |                   |                            | 6,811                             | 184 (77-291)               |
| IX 5 (I21-I219, I200, and I209)                                                                           |                   |                            | 32,876                            | 2,055 (1,090-3,020)        |
| IX 9 (I25-I259)                                                                                           |                   |                            | 7,722                             | 106 (55-156)               |
| IX 11 (I3-I399)                                                                                           |                   |                            | 381                               | 381 (-)                    |
| IX 12 (I40-I419 and I43-I499)                                                                             |                   |                            | 18,914                            | 822 (201-1,443)            |
| IX 13 (I42-I429)                                                                                          |                   |                            | 268,632                           | 1,272 (1,011-1,533)        |
| IX 14 (I5-I599)                                                                                           |                   |                            | 52,138                            | 1,448 (728-2,169)          |
| IX 15 (I60-I999)                                                                                          |                   |                            | 25,368                            | 3,171 (-1,973-8,315)       |
| X Respiratory system diseases (J00-J99)                                                                   | 29,002            | 806 (374-1,237)            |                                   |                            |
| XI Digestive system diseases (K00-K93)                                                                    | 5,173             | 1,293 (208-2,378)          |                                   |                            |
| XII Skin and subcutaneous tissue diseases (L00-L99)                                                       | 1,121             | 224 (171-277)              |                                   |                            |
| XIII Musculoskeletal system and connective tissue diseases (M00-M99)                                      | 14,166            | 354 (137-571)              |                                   |                            |
| XIV Genitourinary system diseases (N00-N99)                                                               | 579               | 97 (47-146)                |                                   |                            |
| XVIII Symptoms, signs and abnormal clinical and laboratory findings not elsewhere classified (R00-R99)    | 15,106            | 321 (210-433)              |                                   |                            |
| XIX Injury, poisoning and certain other consequences of external causes (S00-T98)                         | 4,359             | 363 (-182-908)             |                                   |                            |
| XXI Factors influencing health status and contact with health services (Z00-Z99)                          | 30,060            | 423 (264-583)              |                                   |                            |
| XXII Codes for special purposes (U00-U99)                                                                 | 3,915             | 186 (170-202)              |                                   |                            |
| Not registered                                                                                            | 6,731             | 30 (26-34)                 |                                   |                            |
| <b>Total cost</b>                                                                                         | <b>600,876</b>    |                            |                                   |                            |
| Of which at least one condition was in chapter IX <sup>c</sup> (% of total cost)                          | 465,493 (77.5)    |                            |                                   |                            |



1  
2  
3  
4  
5  
6  
7  
8  
9  
10  
11  
12  
13  
14  
15  
16  
17  
18  
19  
20  
21  
22  
23  
24  
25  
26  
27  
28  
29  
30  
31  
32  
33  
34  
35  
36  
37  
38  
39  
40  
41  
42  
43  
44  
45  
46

|                                                                 |                |
|-----------------------------------------------------------------|----------------|
| Of which the main condition was in chapter IX (% of total cost) | 413,841 (68.9) |
|-----------------------------------------------------------------|----------------|

<sup>a</sup>No costs were associated with the omitted chapters and subchapters.

<sup>b</sup>Only specified for ICD chapter IX Circulatory system diseases.

<sup>c</sup>At least one condition in chapter IX 3: EUR 176,829; IX 5: EUR 62,397; IX 9: EUR 41,120; IX 11: EUR 4,678; IX 12: EUR 51,190; IX 13: EUR 304,623; IX 14: EUR 117,898; IX 15: EUR 42,600. Costs for a specific visit may be included in the sum for more than one subchapter.

TS = Takotsubo syndrome, CI = confidence interval

For peer review only

## DISCUSSION

The present findings indicate that the initial hospitalisation represents only 2/5 of the direct health care costs during the 6 months after diagnosis of TS. Additional costs were incurred by readmissions, often for Circulatory system disorders (including TS), and an average of more than 15 additional health care visits per patient during the period. Overall, Circulatory system disorders were the main condition in health care encounters, corresponding to almost 70% of all costs in this patient population.

We found little difference in cost of care related to age, country of birth and present or previous smoking behaviour. Patients with previous diagnoses of AMI, angina, stroke or hypertension had lower costs of care than those without but the differences were small and these results may not be generalisable to the population. Men had higher costs of care than women; however, because only five men participated, this result should be viewed with caution and may not represent the general population of men. Still, previous reports suggest that men suffer from more complications,<sup>9</sup> which is reflected in the higher cost of care in our study. Despite the small number of men in the sample, the proportion and age are similar to that of larger cohorts.<sup>2 19</sup> The proportion of patients with diabetes mellitus was lower than in previous studies,<sup>6 20</sup> but similar to that of a larger Swedish cohort.<sup>4</sup> This circumstance may have affected the total cost of care.

The total average length of hospital stay during the study period was 10.2 days, with index hospitalisation constituting 6.4 days of this period. Previous studies have reported average hospital stays of 3.6 to 8 days for index hospitalisation.<sup>9 10 21</sup> Average length of stay in hospital decreased from 4.3 to 3.8 days between 2007 and 2012.<sup>21</sup> In Sweden, the median hospital stay for patients <80 years who were discharged alive after an AMI was 4 days in 2015. This figure has not changed since 2008.<sup>22</sup> Common procedures during hospitalisation were coronary angiography, Doppler echocardiogram, conventional ECG and oesophageal ECG.

1  
2  
3 In this study we found that the total average health care cost per patient from hospitalisation to 6  
4 months after discharge for TS was EUR 10,360, the equivalent of USD 11,491, of which less than half  
5 of the costs (43.4 %) were incurred during index hospitalisation. This was not in agreement with the  
6 calculated average cost of USD 16,723 for only hospitalisation found by Khera et al.<sup>9</sup> The large  
7 discrepancy in cost may be due to organisational differences between the healthcare systems in  
8 Europe and the US. The divergence between reported costs for TS hospitalisations in the two  
9 previous studies<sup>9 10</sup> may be due to the difference between costs and charges in those two studies,  
10 given that cost-to-charge ratios can vary between 0.12 and 0.96.<sup>23</sup>

11  
12  
13  
14  
15  
16  
17  
18  
19  
20  
21  
22 There were 40 readmissions during the 6 months after initial discharge, 11 of which occurred during  
23 the first 30 days. This figure equals a 30-day readmission rate of 19%, which is higher than the 11.6%  
24 that has previously been reported in patients with TS.<sup>21</sup> No data on the 6-month or 1-year (all-cause)  
25 readmission rate of patients with TS could be found but the readmission rate in Sweden 1 year after  
26 an AMI was 35% for females 65–75 years old and 28% for females 0–64 years old. Approximately half  
27 of these readmissions were for non-cardiovascular causes.<sup>22</sup> The readmission rate for patients with  
28 TS in this study is comparable (34.5%) but in half the time. The proportion of noncardiovascular  
29 causes for readmission was also similar in the current study, where 21 of 40 readmissions had a  
30 noncardiovascular main diagnosis. This finding indicates that health is affected after TS, which is in  
31 line with previous studies.<sup>24 25</sup> There is a large potential for cost savings if the readmission rate can be  
32 reduced, even if this means increasing the number of outpatient and primary care visits. In our study  
33 the cost for readmission (EUR 169,739) was equivalent to the total cost of all outpatient and primary  
34 care encounters combined (EUR 170,514).

35  
36  
37  
38  
39  
40  
41  
42  
43  
44  
45  
46  
47  
48  
49  
50  
51 Most costs in our study originated from ICD chapter IX (I00–I99 Circulatory system diseases) and  
52 most of these costs related to subchapter I42–I49, which is where TS is usually diagnosed. There is no  
53 specific ICD code for TS in the Swedish version of the ICD-10 (in some countries TS has the ICD code  
54 I51.81, according to ICD-10-CM coding practices). Thus, much of the care that these patients use  
55  
56  
57  
58  
59  
60

1  
2  
3 relates to TS or other cardiovascular diseases. Other main conditions that rendered substantial costs  
4 originated from ICD chapters II (C00–D48 Neoplasms), V (F00–F99 Mental and behavioural disorders),  
5 and X (J00–J99 Respiratory system diseases). These costs are expected considering previously  
6 reported comorbidities for TS. Other TS comorbidities are neurologic, renal and endocrine diseases,  
7 although there were small concurrent costs for these conditions in this sample.<sup>6 20</sup>  
8  
9

10  
11  
12  
13  
14  
15 Studies mapping resource use and costs related to a disease are commonly called COI studies. COI  
16 studies are often criticised for the lack of comparison between different healthcare programmes and  
17 therefore are of less use in decision making. Although insufficient to provide guidance on treatment  
18 choices, descriptive COI estimates can be applied to understand the magnitude of the disease in  
19 relation to other diagnoses and to identify patient groups for prioritising research and the  
20 development of intervention programmes.<sup>11 26 27</sup> In a disease such as TS in which the preconception  
21 has been that the disease is relatively benign<sup>4 8</sup> and where follow-up guidelines are lacking,<sup>2</sup> COI can  
22 be a useful tool to help place the disease in perspective to other diagnoses.<sup>11</sup> Furthermore, studies  
23 on the use of health care resources after initial discharge from hospital are needed given that the  
24 healthcare system and availability of, for example, specialised outpatient care will greatly affect the  
25 length of initial hospitalisation.  
26  
27  
28  
29  
30  
31  
32  
33  
34  
35  
36  
37  
38  
39

40  
41 It appears from the results in this and previous studies that patients with TS have comparable  
42 readmission and mortality rates as patients with AMI.<sup>4 8</sup> Together, these results indicate that the  
43 health care of TS patients' needs to be further developed, including implementing a supportive  
44 follow-up programme of individualised care. Recent studies evaluating a person-centred intervention  
45 from hospital to primary care for patients with acute coronary syndrome found a significant increase  
46 in self-efficacy in the intervention-group that was sustainable up to 2 years.<sup>28 29</sup> Follow-up  
47 programmes recognising the patient as a person with a unique life history and needs have proven  
48 efficient by reducing readmissions to hospital in patients with severe chronic heart failure.<sup>30 31</sup>  
49  
50  
51  
52  
53  
54  
55  
56  
57

58 Previous studies have also shown that patients with TS often have persisting symptoms, such as pain,  
59  
60

1  
2  
3 fatigue and shortness of breath for up to 4 years after discharge<sup>24 25 32</sup> and would thus probably  
4  
5 benefit from this kind of supportive follow-up programme.  
6  
7

## 8 **Methodological discussion**

9

10  
11 The main strengths of this study were the comprehensive data on resource use available in the VEGA  
12 database and medical records, which makes follow-up feasible after initial hospitalisation. The study,  
13  
14 however, was limited by the small sample size, which was related to the regional demarcation of the  
15  
16 VEGA database (thus making inclusion of patients from other regions impossible) and by the set  
17  
18 inclusion and exclusion criteria, i.e. only patients that had undergone coronary angiography were  
19  
20 included (because the lack of a specific ICD-code for TS in the Swedish version of ICD-10 makes  
21  
22 identification of TS more difficult) and patients with a predicted survival of <6 months were excluded  
23  
24 from the study. The issue of selection bias also must be considered. Patients with TS that did not  
25  
26 undergo coronary angiography were not included in the study. The study concerns patients  
27  
28 hospitalised for TS in Sweden and the results may therefore not be generalized to other settings.  
29  
30 Moreover, the study do not include information on if the participants had primary or secondary TS.  
31  
32 All of these factors may also influence use of care and its accompanying costs. Costs were calculated  
33  
34 based on template costs, i.e. the DRG weights and an average cost per DRG and weighted costs from  
35  
36 national statistics for primary care visits. These results are proxies for the actual health care costs and  
37  
38 calculations and are used nationally to compare costs, for example, between counties. The estimated  
39  
40 costs should thus include the burden to the healthcare system of standard treatments and  
41  
42 examinations during health care encounters but may fail to cover unusual health care interventions.  
43  
44 Finally, the study was limited to 6 months after diagnosis of TS, which increases the follow-up  
45  
46 compared with previous studies in this field but still neglecting costs occurring during later stages of  
47  
48 the TS disease. Yet, the 6-month study period is expected to cover most resource use related to TS in  
49  
50 that the cardiac function usually recovers within that period.<sup>2</sup> The study should be viewed as a first  
51  
52 step towards a more comprehensive understanding of the economic burden of TS to the healthcare  
53  
54  
55  
56  
57  
58  
59  
60

1  
2  
3 system. Future studies are warranted to address the long-term economic outcomes after TS. The  
4  
5 introduction of a specific ICD code for TS in the Swedish version of the ICD is also needed and would  
6  
7 make research easier and more reliable.  
8  
9

## 10 11 **CONCLUSION** 12 13 14

15 The current study shows that health care costs from hospitalisation to 6 months after discharge for  
16  
17 TS primarily relate to a cardiac condition. Although there are frequent encounters with outpatient  
18  
19 clinics and primary care, most costs stem from hospitalisations, of which readmissions contributed  
20  
21 substantially to the total cost. Patients with TS would probably benefit from a supportive follow-up  
22  
23 programme after discharge from hospital.  
24  
25

## 26 27 **AUTHORS' CONTRIBUTIONS** 28 29 30

31 SW and HG contributed to designing and planning of the study, conducting and analysing the data,  
32  
33 and writing and reviewing the manuscript. IE, KU and EO contributed to designing and planning the  
34  
35 study and writing and reviewing the manuscript.  
36  
37  
38

## 39 40 **DATA SHARING STATEMENT** 41 42

43 No additional data are available.  
44  
45

## 46 47 **FUNDING** 48 49 50

51 This work was supported by the Centre for Person-Centred Care (GPCC), University of Gothenburg,  
52  
53 Sweden. GPCC is funded by the Swedish Government's grant for Strategic Research Areas, Care  
54  
55 Sciences (Application to Swedish Research Council no. 2009-1088) and co-funded by the University of  
56  
57 Gothenburg, Sweden. It was also supported in accordance to the Swedish agreement between the  
58  
59 government and the county councils concerning economic support for providing an infrastructure for  
60

research and education of doctors (ALF). Swedish Heart and Lung Association (E093/13, E088/14 and E127/15), the Emelle Fund (161/14) and the Royal and Hvitfeldtska Foundation also contributed to the funding of the study.

## DECLARATION OF CONFLICTING INTRESTS

Elmir Omerovic reports grants and personal fees from AstraZeneca and grants from Abbott outside the submitted work. Sara Wallström, Inger Ekman, Kerstin Ulin and Hanna Gyllensten have no conflicts of interest to report.

## REFERENCES

1. Bybee KA, Kara T, Prasad A, et al. Systematic review: transient left ventricular apical ballooning: a syndrome that mimics ST-segment elevation myocardial infarction. *Ann Intern Med* 2004;141(11):858-65. [published Online First: 2004/12/08]
2. Lyon AR, Bossone E, Schneider B, et al. Current state of knowledge on Takotsubo syndrome: a Position Statement from the Taskforce on Takotsubo Syndrome of the Heart Failure Association of the European Society of Cardiology. *Eur J Heart Fail* 2016;18(1):8-27. doi: 10.1002/ejhf.424 [published Online First: 2015/11/10]
3. Pilgrim TM, Wyss TR. Takotsubo cardiomyopathy or transient left ventricular apical ballooning syndrome: A systematic review. *Int J Cardiol* 2008;124(3):283-92. doi: 10.1016/j.ijcard.2007.07.002 [published Online First: 2007/07/27]
4. Redfors B, Vedad R, Angeras O, et al. Mortality in takotsubo syndrome is similar to mortality in myocardial infarction - A report from the SWEDHEART registry. *Int J Cardiol* 2015;185:282-9. doi: 10.1016/j.ijcard.2015.03.162 [published Online First: 2015/03/31]
5. Schultz T, Shao Y, Redfors B, et al. Stress-induced cardiomyopathy in Sweden: evidence for different ethnic predisposition and altered cardio-circulatory status. *Cardiology* 2012;122(3):180-6. doi: 10.1159/000338814 [published Online First: 2012/08/01]
6. El-Sayed AM, Brinjkji W, Salka S. Demographic and co-morbid predictors of stress (takotsubo) cardiomyopathy. *Am J Cardiol* 2012;110(9):1368-72. doi: 10.1016/j.amjcard.2012.06.041 [published Online First: 2012/07/24]
7. Omerovic E. Takotsubo syndrome: not as benign as once believed. *Eur J Heart Fail* 2016;18(6):657-9. doi: 10.1002/ejhf.555 [published Online First: 2016/05/03]
8. Stiermaier T, Moeller C, Oehler K, et al. Long-term excess mortality in takotsubo cardiomyopathy: predictors, causes and clinical consequences. *Eur J Heart Fail* 2016;18(6):650-6. doi: 10.1002/ejhf.494 [published Online First: 2016/03/19]
9. Khera R, Light-McGroary K, Zahr F, et al. Trends in hospitalization for takotsubo cardiomyopathy in the United States. *Am Heart J* 2016;172:53-63. doi: 10.1016/j.ahj.2015.10.022 [published Online First: 2016/02/10]
10. Pant S, Deshmukh A, Mehta K, et al. Burden of arrhythmias in patients with Takotsubo cardiomyopathy (apical ballooning syndrome). *Int J Cardiol* 2013;170(1):64-8. doi: 10.1016/j.ijcard.2013.10.041 [published Online First: 2013/11/12]
11. Tarricone R. Cost-of-illness analysis. What room in health economics? *Health Policy* 2006;77(1):51-63. doi: 10.1016/j.healthpol.2005.07.016 [published Online First: 2005/09/06]

12. Osika Friberg I, Krantz G, Maatta S, et al. Sex differences in health care consumption in Sweden: A register-based cross-sectional study. *Scandinavian journal of public health* 2016;44(3):264-73. doi: 10.1177/1403494815618843 [published Online First: 2015/12/10]
13. Bengtsson K, Jacobsson LTH, Rydberg B, et al. Comparisons between comorbid conditions and health care consumption in rheumatoid arthritis patients with or without biological disease-modifying anti-rheumatic drugs: a register-based study. *BMC Musculoskelet Disord* 2016;17 doi: 10.1186/s12891-016-1354-7
14. Wallerstedt SM, Bladh L, Ramsberg J. A cost-effectiveness analysis of an in-hospital clinical pharmacist service. *BMJ open* 2012;2(1)
15. Prisindex: Sveriges kommuner och landsting (SKL); 2016 [Available from: <http://skl.se/ekonomijuridikstatistik/ekonomi/budgetochplanering/prisindex.1331.html> accessed 20160701.
16. Statistik om hälso- och sjukvård samt regional utveckling 2014 Stockholm: Sveriges kommuner och landsting (SKL) 2015.
17. Annual average exchange rate (aggregate): Sveriges Riksbank; 2016 [Available from: <http://www.riksbank.se/en/Interest-and-exchange-rates/Annual-aggregate-Exchange-rates/> accessed 1021 2016.
18. Thompson SG, Barber JA. How should cost data in pragmatic randomised trials be analysed? *BMJ* 2000;320(7243):1197-200.
19. Templin C, Ghadri JR, Diekmann J, et al. Clinical Features and Outcomes of Takotsubo (Stress) Cardiomyopathy. *N Engl J Med* 2015;373(10):929-38. doi: 10.1056/NEJMoa1406761 [published Online First: 2015/09/04]
20. Pelliccia F, Parodi G, Greco C, et al. Comorbidities frequency in Takotsubo syndrome: an international collaborative systematic review including 1109 patients. *Am J Med* 2015;128(6):654.e11-9. doi: 10.1016/j.amjmed.2015.01.016 [published Online First: 2015/02/11]
21. Murugiah K, Wang Y, Desai NR, et al. Trends in Short- and Long-Term Outcomes for Takotsubo Cardiomyopathy Among Medicare Fee-for-Service Beneficiaries, 2007 to 2012. *JACC Heart failure* 2016;4(3):197-205. doi: 10.1016/j.jchf.2015.09.013 [published Online First: 2016/01/10]
22. SWEDHEART Annual report 2015. Uppsala: Uppsala Clinical Research Center (UCR), 2016.
23. Center RDA. Calculating Cost: Cost-to-Charge Ratios 2013 [Available from: <http://www.resdac.org/media/calculating-cost-cost-charge-ratios> accessed 0812 2016.
24. Wallstrom S, Ulin K, Omerovic E, et al. Self-reported symptoms 8weeks after discharge: A comparison of takotsubo syndrome and myocardial infarction. *Int J Cardiol* 2016;224:348-52. doi: 10.1016/j.ijcard.2016.09.052 [published Online First: 2016/10/25]
25. Wallstrom S, Ulin K, Omerovic E, et al. Symptoms in patients with takotsubo syndrome: a qualitative interview study. *BMJ open* 2016;6(10):e011820. doi: 10.1136/bmjopen-2016-011820 [published Online First: 2016/10/07]
26. Rice DP. Cost of illness studies: what is good about them? *Inj Prev* 2000;6(3):177-9. [published Online First: 2000/09/26]
27. Oxman AD, Fretheim A, Lavis JN, et al. SUPPORT Tools for evidence-informed health Policymaking (STP) 12: Finding and using research evidence about resource use and costs. *Health Research Policy and Systems* 2009;7(Suppl 1):S12. doi: 10.1186/1478-4505-7-s1-s12
28. Fors A, Ekman I, Taft C, et al. Person-centred care after acute coronary syndrome, from hospital to primary care - A randomised controlled trial. *Int J Cardiol* 2015;187:693-9. doi: 10.1016/j.ijcard.2015.03.336 [published Online First: 2015/04/29]
29. Fors A, Swedberg K, Ulin K, et al. Effects of person-centred care after an event of acute coronary syndrome: Two-year follow-up of a randomised controlled trial. *Int J Cardiol* 2017;249:42-47. doi: 10.1016/j.ijcard.2017.08.069 [published Online First: 2017/09/13]
30. Hansson E, Ekman I, Swedberg K, et al. Person-centred care for patients with chronic heart failure - a cost-utility analysis. *Eur J Cardiovasc Nurs* 2016;15(4):276-84. doi: 10.1177/1474515114567035 [published Online First: 2015/01/18]



- 1  
2  
3 31. Sahlen KG, Boman K, Brannstrom M. A cost-effectiveness study of person-centered integrated  
4 heart failure and palliative home care: Based on a randomized controlled trial. *Palliat Med*  
5 2016;30(3):296-302. doi: 10.1177/0269216315618544 [published Online First: 2015/11/26]  
6  
7 32. Elesber AA, Prasad A, Lennon RJ, et al. Four-year recurrence rate and prognosis of the apical  
8 ballooning syndrome. *J Am Coll Cardiol* 2007;50(5):448-52. doi: 10.1016/j.jacc.2007.03.050  
9 [published Online First: 2007/07/31]  
10  
11  
12  
13  
14  
15  
16  
17  
18  
19  
20  
21  
22  
23  
24  
25  
26  
27  
28  
29  
30  
31  
32  
33  
34  
35  
36  
37  
38  
39  
40  
41  
42  
43  
44  
45  
46  
47  
48  
49  
50  
51  
52  
53  
54  
55  
56  
57  
58  
59  
60

For peer review only

**STROBE 2007 (v4) Statement—Checklist of items that should be included in reports of *cohort studies***

| Section/Topic                | Item # | Recommendation                                                                                                                                                                       | Reported on page # |
|------------------------------|--------|--------------------------------------------------------------------------------------------------------------------------------------------------------------------------------------|--------------------|
| <b>Title and abstract</b>    | 1      | (a) Indicate the study's design with a commonly used term in the title or the abstract                                                                                               | 2                  |
|                              |        | (b) Provide in the abstract an informative and balanced summary of what was done and what was found                                                                                  | 2                  |
| <b>Introduction</b>          |        |                                                                                                                                                                                      |                    |
| Background/rationale         | 2      | Explain the scientific background and rationale for the investigation being reported                                                                                                 | 4+5                |
| Objectives                   | 3      | State specific objectives, including any prespecified hypotheses                                                                                                                     | 4+5                |
| <b>Methods</b>               |        |                                                                                                                                                                                      |                    |
| Study design                 | 4      | Present key elements of study design early in the paper                                                                                                                              | 5-7                |
| Setting                      | 5      | Describe the setting, locations, and relevant dates, including periods of recruitment, exposure, follow-up, and data collection                                                      | 5-7                |
| Participants                 | 6      | (a) Give the eligibility criteria, and the sources and methods of selection of participants. Describe methods of follow-up                                                           | 5-7                |
|                              |        | (b) For matched studies, give matching criteria and number of exposed and unexposed                                                                                                  | n/a                |
| Variables                    | 7      | Clearly define all outcomes, exposures, predictors, potential confounders, and effect modifiers. Give diagnostic criteria, if applicable                                             | 5-7                |
| Data sources/<br>measurement | 8*     | For each variable of interest, give sources of data and details of methods of assessment (measurement). Describe comparability of assessment methods if there is more than one group | 5-7                |
| Bias                         | 9      | Describe any efforts to address potential sources of bias                                                                                                                            | 19+20              |
| Study size                   | 10     | Explain how the study size was arrived at                                                                                                                                            | 5-7                |
| Quantitative variables       | 11     | Explain how quantitative variables were handled in the analyses. If applicable, describe which groupings were chosen and why                                                         | 5-7                |
| Statistical methods          | 12     | (a) Describe all statistical methods, including those used to control for confounding                                                                                                | 6+7                |
|                              |        | (b) Describe any methods used to examine subgroups and interactions                                                                                                                  | n/a                |
|                              |        | (c) Explain how missing data were addressed                                                                                                                                          | 5-7                |
|                              |        | (d) If applicable, explain how loss to follow-up was addressed                                                                                                                       | 5-7                |
|                              |        | (e) Describe any sensitivity analyses                                                                                                                                                | n/a                |
| <b>Results</b>               |        |                                                                                                                                                                                      |                    |

|                          |     |                                                                                                                                                                                                                                                                                                                                                                                                               |                    |
|--------------------------|-----|---------------------------------------------------------------------------------------------------------------------------------------------------------------------------------------------------------------------------------------------------------------------------------------------------------------------------------------------------------------------------------------------------------------|--------------------|
| Participants             | 13* | (a) Report numbers of individuals at each stage of study—eg numbers potentially eligible, examined for eligibility, confirmed eligible, included in the study, completing follow-up, and analysed<br>(b) Give reasons for non-participation at each stage<br>(c) Consider use of a flow diagram                                                                                                               | 5-7<br>5-7<br>-    |
| Descriptive data         | 14* | (a) Give characteristics of study participants (eg demographic, clinical, social) and information on exposures and potential confounders<br>(b) Indicate number of participants with missing data for each variable of interest<br>(c) Summarise follow-up time (eg, average and total amount)                                                                                                                | 8-11<br>5-7<br>n/a |
| Outcome data             | 15* | Report numbers of outcome events or summary measures over time                                                                                                                                                                                                                                                                                                                                                | 8-15               |
| Main results             | 16  | (a) Give unadjusted estimates and, if applicable, confounder-adjusted estimates and their precision (eg, 95% confidence interval). Make clear which confounders were adjusted for and why they were included<br>(b) Report category boundaries when continuous variables were categorized<br>(c) If relevant, consider translating estimates of relative risk into absolute risk for a meaningful time period | 8-15<br>n/a<br>n/a |
| Other analyses           | 17  | Report other analyses done—eg analyses of subgroups and interactions, and sensitivity analyses                                                                                                                                                                                                                                                                                                                | n/a                |
| <b>Discussion</b>        |     |                                                                                                                                                                                                                                                                                                                                                                                                               |                    |
| Key results              | 18  | Summarise key results with reference to study objectives                                                                                                                                                                                                                                                                                                                                                      | 16-20              |
| <b>Limitations</b>       |     |                                                                                                                                                                                                                                                                                                                                                                                                               |                    |
| Interpretation           | 20  | Give a cautious overall interpretation of results considering objectives, limitations, multiplicity of analyses, results from similar studies, and other relevant evidence                                                                                                                                                                                                                                    | 16-20              |
| Generalisability         | 21  | Discuss the generalisability (external validity) of the study results                                                                                                                                                                                                                                                                                                                                         | 16-20              |
| <b>Other information</b> |     |                                                                                                                                                                                                                                                                                                                                                                                                               |                    |
| Funding                  | 22  | Give the source of funding and the role of the funders for the present study and, if applicable, for the original study on which the present article is based                                                                                                                                                                                                                                                 | 20+21              |

\*Give information separately for cases and controls in case-control studies and, if applicable, for exposed and unexposed groups in cohort and cross-sectional studies.

**Note:** An Explanation and Elaboration article discusses each checklist item and gives methodological background and published examples of transparent reporting. The STROBE checklist is best used in conjunction with this article (freely available on the Web sites of PLoS Medicine at <http://www.plosmedicine.org/>, Annals of Internal Medicine at <http://www.annals.org/>, and Epidemiology at <http://www.epidem.com/>). Information on the STROBE Initiative is available at [www.strobe-statement.org](http://www.strobe-statement.org).

# BMJ Open

## A cohort study of health care use, costs and diagnoses from onset to 6 months after discharge for takotsubo syndrome in Sweden

|                                 |                                                                                                                                                                                                                                                                                                                                                                                                                                                                                                                                                                                                                                                                                                                                                                                                                                                                                                                                                                                                                                 |
|---------------------------------|---------------------------------------------------------------------------------------------------------------------------------------------------------------------------------------------------------------------------------------------------------------------------------------------------------------------------------------------------------------------------------------------------------------------------------------------------------------------------------------------------------------------------------------------------------------------------------------------------------------------------------------------------------------------------------------------------------------------------------------------------------------------------------------------------------------------------------------------------------------------------------------------------------------------------------------------------------------------------------------------------------------------------------|
| Journal:                        | <i>BMJ Open</i>                                                                                                                                                                                                                                                                                                                                                                                                                                                                                                                                                                                                                                                                                                                                                                                                                                                                                                                                                                                                                 |
| Manuscript ID                   | bmjopen-2018-027814.R1                                                                                                                                                                                                                                                                                                                                                                                                                                                                                                                                                                                                                                                                                                                                                                                                                                                                                                                                                                                                          |
| Article Type:                   | Research                                                                                                                                                                                                                                                                                                                                                                                                                                                                                                                                                                                                                                                                                                                                                                                                                                                                                                                                                                                                                        |
| Date Submitted by the Author:   | 17-Jan-2019                                                                                                                                                                                                                                                                                                                                                                                                                                                                                                                                                                                                                                                                                                                                                                                                                                                                                                                                                                                                                     |
| Complete List of Authors:       | Wallström, Sara; Institute of Health and Care Sciences, Sahlgrenska Academy, University of Gothenburg; University of Gothenburg Centre for Person-Centred Care, Sahlgrenska Academy, University of Gothenburg Ekman, Inger; Institute of Health and Care Sciences, Sahlgrenska Academy, University of Gothenburg; University of Gothenburg Centre for Person-Centred Care, Sahlgrenska Academy, University of Gothenburg Omerovic, Elmir; Department of Cardiology, Sahlgrenska University Hospital; Department of Molecular and Clinical Medicine, Sahlgrenska Academy, University of Gothenburg Ulin, Kerstin; Institute of Health and Care Sciences, Sahlgrenska Academy, University of Gothenburg; University of Gothenburg Centre for Person-Centred Care, Sahlgrenska Academy, University of Gothenburg Gyllensten, Hanna ; Institute of Health and Care Sciences, Sahlgrenska Academy, University of Gothenburg; University of Gothenburg Centre for Person-Centred Care , Sahlgrenska Academy, University of Gothenburg |
| <b>Primary Subject Heading</b>: | Cardiovascular medicine                                                                                                                                                                                                                                                                                                                                                                                                                                                                                                                                                                                                                                                                                                                                                                                                                                                                                                                                                                                                         |
| Secondary Subject Heading:      | Health economics                                                                                                                                                                                                                                                                                                                                                                                                                                                                                                                                                                                                                                                                                                                                                                                                                                                                                                                                                                                                                |
| Keywords:                       | CARDIOLOGY, HEALTH ECONOMICS, Health economics < HEALTH SERVICES ADMINISTRATION & MANAGEMENT, Adult cardiology < CARDIOLOGY, Heart failure < CARDIOLOGY, Cardiomyopathy < CARDIOLOGY                                                                                                                                                                                                                                                                                                                                                                                                                                                                                                                                                                                                                                                                                                                                                                                                                                            |
|                                 |                                                                                                                                                                                                                                                                                                                                                                                                                                                                                                                                                                                                                                                                                                                                                                                                                                                                                                                                                                                                                                 |

SCHOLARONE™  
Manuscripts

# A cohort study of health care use, costs and diagnoses from onset to 6 months after discharge for takotsubo syndrome in Sweden

Sara Wallström<sup>1,2</sup>, Inger Ekman<sup>1,2</sup>, Elmir Omerovic<sup>3</sup>, Kerstin Ulin<sup>1,2</sup>, Hanna Gyllensten<sup>1,2,4</sup>

<sup>1</sup>Institute of Health and Care Sciences, Sahlgrenska Academy, University of Gothenburg, Box 457, 405 30 Gothenburg, Sweden

<sup>2</sup>University of Gothenburg Centre for Person-Centred Care (GPCC), Sahlgrenska Academy, University of Gothenburg, Box 457, 405 30 Gothenburg, Sweden

<sup>3</sup>Department of Cardiology, Sahlgrenska University Hospital, 413 45 Gothenburg, Sweden  
Department of Molecular and Clinical Medicine, The Wallenberg Laboratory, Sahlgrenska Academy, University of Gothenburg, 413 45 Gothenburg, Sweden

<sup>4</sup>Department of Clinical Neuroscience, Karolinska Institutet, 171 77 Stockholm, Sweden  
This author takes responsibility for all aspects of the reliability and freedom from bias of the data presented and their discussed interpretation.

Corresponding author: Sara Wallström, Institute of Health and Care Sciences, Sahlgrenska Academy, University of Gothenburg, Box 457, 405 30 Gothenburg, Sweden

Telephone: +46(0)31-786 60 79. Fax: +46(0)31-786 60 50

E-mail: [sara.wallstrom@gu.se](mailto:sara.wallstrom@gu.se)

**Word count:** 3550

## ABSTRACT

**Objective:** Little is known about the economic impact of takotsubo syndrome (TS) for patients and for the health system after initial discharge from hospital. Therefore, the aim of this study was to describe the healthcare resource use and calculate direct healthcare costs for TS, from hospitalization to six months after discharge, and explore the distribution of costs between TS and other diagnoses among patients with TS.

**Method, participants and setting:** Cohort study investigating direct healthcare costs from hospitalization, open specialized outpatient and primary care. Healthcare resource use during six months after diagnosis with TS, were collected for 58 consecutive patients from the Regional Patient Register. Incidence-based direct healthcare costs, in 2015 values, were calculated using diagnosis-related group weights and unit costs from national statistics on healthcare costs.

**Results:** The mean length of hospital stay was 10.2 days, index 6.4 and readmissions 3.8 days. The mean number of follow-up encounters per patient was 15.6, of which 2/3 was specialized outpatient and 1/3 was primary care. This resulted in an average cost of EUR 10,360. Of this, costs of EUR 8,026 (77.5%) occurred during encounters for which at least one of the registered conditions was cardiovascular. Costs differed little according to background characteristics.

**Conclusion:** This study shows that patients utilize hospital, specialized outpatient and primary care after discharge for TS. Most direct healthcare costs relate to cardiac diagnoses. Patients with TS would probably benefit from a supportive follow-up program after discharge from hospital.

## KEY WORDS

- CARDIOLOGY
- HEALTH ECONOMICS
- Health economics < HEALTH SERVICES ADMINISTRATION & MANAGEMENT
- Adult cardiology < CARDIOLOGY
- Heart failure < CARDIOLOGY

## STRENGTHS AND LIMITATIONS

- This study explores an under- investigated area: cost of illness and health economics in patients with takotsubo syndrome.
- Register offered the opportunity to investigate direct health care costs from inpatient, specialized outpatient and primary care.
- This study provides insight on the distribution of cost among patients with takotsubo syndrome.
- Limitations include a small sample size, that the data was limited to direct health care costs, which are based on proxy and the limited study period.

## INTRODUCTION

Takotsubo syndrome (TS) is a form of acute reversible heart failure, which usually recovers spontaneously in 12 weeks. Its clinical presentation at onset has similar features to those of an acute myocardial infarction (AMI) with chest pain, dyspnoea, ECG changes, and raised markers of myocardial necrosis.<sup>1,2</sup> TS is characterized by regional wall motion abnormalities affecting one or both ventricles of the heart and absence of flow-limiting lesion in coronary arteries. The pathophysiological mechanisms underlying TS are not fully understood, but a surge of the hormone catecholamines is believed to play a vital part. Onset is often preceded by a stressful event, either psychological or physical.<sup>2</sup>

TS is most common among postmenopausal women; 84%–91% of cases are female and the mean age varies between 63 and 76 years.<sup>3–5</sup> Knowledge regarding potential risk factors is scarce, but smoking, hyperlipidemia, alcohol abuse, and anxiety have been recorded.<sup>6</sup> Due to a lack of diagnosis uniformity, it has been difficult to determine the exact number of TS cases per annum; but estimates suggest that there are 50–100,000 cases per year in the United States and a similar number in Europe.<sup>2</sup> There are no reliable figures for Sweden, but an estimation based on population would be 1,500–3,000 cases per annum in Sweden. This is in line with the estimation of 2,000 cases per annum in Sweden from the Swedish Coronary Angiography and Angioplasty Registry (SCAAR).<sup>7</sup>

TS was previously assumed to be relatively benign and to have little impact on long-term survival. However, recent studies have shown that TS affects both short- and long-term survival, which are comparable to, or worse than, those in patients affected by AMI.<sup>4,8</sup> Mortality from cardiovascular causes is comparable between these groups; but the excess mortality among patients with TS is related to non-cardiovascular or unknown causes. Male sex, Killip class III or IV at admission according to classification for heart failure, and diabetes mellitus increases the likelihood of mortality among TS patients.<sup>8</sup>

There are currently few guidelines for care or follow-up for patients with TS. At hospital investigations often include coronary angiography, ultra-cardiogram and cardiac biomarkers. Treatment is aimed at supportive care to sustain life and minimize complications during the recovery of normal cardiac function. At least one follow-up visit with a specialist after discharge from hospital to review medication and confirm recovery of cardiac function.<sup>2</sup> Little is known of healthcare resources used for this follow-up. To our knowledge there are only two published studies examining costs after TS, both conducted in one American setting. These studies calculated the average cost of hospital stay for patients with TS to USD 16,723 in 2007–2011<sup>9</sup> and the total average charges to USD 61,034 in 2006–2010 for TS patients without arrhythmias<sup>10</sup> (concurrent arrhythmias may increase the average inpatient charge by USD 11,334<sup>10</sup>).

To our knowledge, there are no studies on the utilization of healthcare resources for TS from Europe, which health system in many aspects are different from that in the US. In addition, little is known about the economic impact of TS for patients and for the health system after initial discharge from hospital. Such studies, often called cost of illness (COI) studies, are useful both for comparing the burden on the healthcare system, of TS to other diseases, and to identify important costs and variation in costs in the treatment of a specific disease, like TS.<sup>11</sup> Therefore, the aim of this study was to describe the healthcare resource use and calculate direct healthcare costs for TS, from

1  
2  
3 hospitalization to six months after discharge, and to explore the distribution of costs between TS and  
4 other diagnoses among patients with TS.  
5

## 6 7 **METHODS**

### 8 9 **Study population and settings**

10  
11 Patients from two hospitals in a city in western Sweden were included consecutively from January  
12 2012 to October 2015. There is no specific code in the Swedish version of ICD International Statistical  
13 Classification of Diseases and Related Health Problems, tenth revision (ICD-10), so all coronary  
14 angiography records from the participating hospitals were screened to identify patients with TS.  
15 Patients were included after identification with coronary angiography and confirmation of diagnosis  
16 with cardiologist. The inclusion criteria were (1) having a diagnosis of TS, (2) speaking Swedish, (3)  
17 having a predicted survival of more than 6 months, and (4) living in Region Västra Götaland. In total,  
18 110 patients with TS were identified during the study period: of those, 29 declined participation, ten  
19 had a predicted survival of less than six months, five did not speak Swedish or were otherwise unable  
20 to fill out the questionnaires, two participated in another incompatible research study, two died and  
21 four accepted participation but were excluded because they did not live in Region Västra Götaland  
22 and were thus not possible to follow through register data. The remaining 58 patients with TS were  
23 included in the study.  
24  
25  
26  
27  
28

### 29 **Data collection**

30  
31 Clinical information about the disease and potential risk factors, for example cardiovascular disease  
32 history, nicotine use, Killip class and hypertension, were retrieved from medical records during the  
33 initial hospital stay. Data on socioeconomic characteristics was collected from each participant using  
34 a questionnaire. Register data about use of healthcare resources and its cost were obtained from the  
35 Regional Patient Register (VEGA), which contains information about all inpatient care, specialized  
36 outpatient care, and primary care in the Region Västra Götaland. The VEGA-database has a near full  
37 coverage of care utilized by the residents of the region.<sup>12 13</sup> Costs for medications and healthcare  
38 provided by the municipalities were not included. Patient information retrieved covered the period  
39 from the day patients were admitted to hospital for TS and the following six months. Healthcare  
40 encounters were classified based on the main diagnosis registered, according to the ICD-10, as  
41 chapters A-Z and using a more detailed level for categorizing disorders within chapter I (Circulatory  
42 system disorders).  
43  
44  
45

46  
47 Incidence-based direct healthcare costs were calculated for consecutive patients, including costs for  
48 healthcare resource use during the six months starting at diagnosis with TS for each patient. Both all-  
49 cause costs and costs for resource use for which cardiovascular causes was the main diagnosis were  
50 calculated. Calculations were made based on the economic perspective of the healthcare sector and  
51 in 2015 values. Costs for specialized health care were calculated using diagnosis-related group (DRG)  
52 weights, retrieved from VEGA.<sup>14</sup> Costs calculated from diagnosis-related group weights were updated  
53 to 2015 values using the Swedish healthcare inflation index, which is a price index for the counties.<sup>15</sup>  
54 Primary care encounters were assigned unit costs based on national statistics for healthcare use and  
55 costs.<sup>16</sup> According to national statistics, the cost for primary care physician visits was SEK 1,397 (EUR  
56 149) in primary care in 2014; this was updated to 2015 values using the Swedish healthcare inflation  
57 index. A visit to other healthcare personnel was weighted as 40% of the cost of a physician visit,  
58  
59  
60



1  
2  
3 phone calls were weighted as one-third of the cost of a visit, and home health care as twice the cost  
4 of a visit.<sup>16</sup> Length of stay in hospital is recorded for each hospital in the registry, thus transfers  
5 between hospitals is registered as re-admissions. Indirect costs resulting from lost productivity and  
6 intangible costs for harm and suffering were not included in the analyses.  
7  
8

9 For two participants, information about the index hospitalization was not obtained from VEGA. Data  
10 for these participants was requested a second time to eliminate errors in the database extraction but  
11 no data could be obtained. Instead, length of hospital stay and diagnosis were identified from the  
12 electronic medical records and the cost was calculated based on the median cost per day for the  
13 other participants' index hospitalization multiplied by the number of days in hospital identified from  
14 the medical records. Using the median provides a conservative estimate of the cost. Register data for  
15 follow-up visits was obtained correctly for both patients. Costs in EUR and USD were calculated using  
16 the average exchange rate in 2015 (EUR 1 = SEK 9.3562, USD 1= SEK 8.435).<sup>17</sup>  
17  
18  
19

## 20 Analyses

21 Descriptive statistics were used to explore the clinical information and background characteristics of  
22 the study population. Quantities and direct healthcare costs were calculated, by type of resource use  
23 and by diagnoses. Due to the expected skewed distribution of costs, confidence intervals for costs  
24 were calculated using bootstrap (using 1000 iterations, seed 1234).<sup>18</sup> For the baseline clinical data  
25 SPSS v. 22 (IBM Corp., Armonk, NY, USA) was used. For the register data, statistical analyses were  
26 performed using Stata SE 14.2 (Stata Corp, College Station, TX, USA).  
27  
28  
29

## 30 Patient and Public Involvement

31 Patients and or public were not involved in this study.  
32  
33

## 34 ETHICS

35 The study was approved by the Regional Ethical Review Board in Gothenburg (approval reference  
36 numbers: Dnr 275-11, T693-11, and T392-15) and complies with the declaration of Helsinki. Written  
37 informed consent were obtained from all participants.  
38  
39  
40

## 41 RESULTS

42 Of the 58 patients included, 53 (91,4%) were women and five (8,6%) men (Table 1). In total, the 58  
43 patients with TS were hospitalized for 593 days during the study period, which equals a mean of 10.2  
44 days per person. The baseline hospitalizations length of stay was on average 6.4 days (interquartile  
45 range: 2–8). In addition, 20 of the 58 patients were readmitted a total of 40 times during the six  
46 months study-period (median 2 readmissions per readmitted patient, range 1-5). Eleven of these  
47 patients were readmitted during the first 30 days. There were a total of 18 readmissions during the  
48 first 30 days and 10 of these had registered conditions belonging to in Circulatory system diseases  
49 (chapter I) in ICD-10. The hospitalizations of eight people (13 readmissions within 30 days) had a  
50 main diagnosis in the ICD sub-chapters I42-I429 (Cardiomyopathy), where TS is usually registered. An  
51 additional 3 readmissions were for Circulatory system disorders (main diagnosis). During the six  
52 months, 19 readmissions were for Circulatory system disorders (main diagnosis), and 13 were for the  
53 ICD sub-chapters I42-I429 (Cardiomyopathy). A further two were for unexplained chest pain (R074).  
54  
55  
56  
57  
58  
59  
60

1  
2  
3 The 58 patients with TS had on average 15.6 follow-up encounters per patient during the six months  
4 following discharge for TS. This includes all categories of healthcare professionals, both direct and  
5 indirect (e.g. telephone contact, writing letter etc.) encounters and visits with both specialist  
6 outpatient clinics and primary care. The most common form of outpatient care utilized was physician  
7 visits, followed by physiotherapist or occupational therapist, which include cardiac rehabilitation  
8 groups, and Registered Nurse (RN) visits. Other visits in outpatient care include consular, biomedical  
9 analyst, audiologist, assistant nurse and psychologist. In primary care, visits with physicians was also  
10 most common but here followed by RN visits. Other visits in primary care included consular, assistant  
11 nurse, podiatrist and psychologist.  
12  
13  
14

15  
16 When dividing costs by care level (Table 2), the most costs were associated with the index  
17 hospitalisation (EUR 260,623), followed by re-admissions (EUR 169,739), outpatient care (EUR  
18 143,911) and primary care (EUR 26,602). The average cost per index hospitalization and re-admission  
19 were almost the same: EUR 4,494 and 4,243, respectively. The total cost for outpatient and primary  
20 care for the 58 patients during the six months following discharge for TS was EUR 170,514.  
21  
22

23 For this sample, there was no clear pattern regarding costs according to socioeconomic factors,  
24 previous disease, or risk factors, although there is a higher (statistically non-significant) mean cost in  
25 particular age groups and among men (Table 3). As only five men participated in the study, further  
26 division based on sex was deemed unreliable.  
27  
28

29 The mean direct healthcare costs during the six months study period was EUR 10,360 (95%  
30 confidence interval (CI): EUR 8,310–12,409) among the 58 patients with TS. Of this, costs of EUR  
31 8,026 (77.5%) occurred during healthcare encounters for which at least one of the registered  
32 conditions was in the ICD chapter IX (I00–I99 Circulatory system diseases). Costs of EUR 7,135 (68.9%  
33 of all costs) were for healthcare encounters in which the main condition was in ICD chapter IX.  
34  
35

36 During the study period, TS was found in ICD I42-I429, which was also the category with the highest  
37 costs of all ICD categories analysed based on main diagnosis of healthcare encounters (Table 4).  
38 Other ICD categories with high costs, when analysing costs by main diagnosis, were I209, I200, I21-  
39 I219 and I5-I599. In addition to Circulatory system diseases, the highest costs among TS patients  
40 were in the ICD categories Mental and behavioural disorders, Respiratory system disorders, and in  
41 the category Factors influencing health status and contacts with health services.  
42  
43  
44  
45  
46  
47  
48  
49  
50  
51  
52  
53  
54  
55  
56  
57  
58  
59  
60

**Table 1 Sociodemographic and disease characteristics among 58 patient diagnosed with TS.**

|                                           | Patients with TS<br>n=58 |
|-------------------------------------------|--------------------------|
| Women (%)                                 | 53 (91.4)                |
| Age median (range)                        | 67.6 (39-86)             |
| Marital status <sup>a</sup>               |                          |
| Married/ co-habitant (%)                  | 31 (54.4)                |
| Single (%)                                | 5 (8.8)                  |
| Divorced (%)                              | 12 (21.1)                |
| Widow/ widower (%)                        | 9 (15.8)                 |
| Education <sup>a</sup>                    |                          |
| Primary and secondary (%)                 | 33 (57.9)                |
| High (%)                                  | 24 (41.4)                |
| Country of birth, Sweden <sup>a</sup> (%) | 49 (86.0)                |
| Nicotine use <sup>b</sup>                 |                          |
| Current (%)                               | 11 (21,2)                |
| Previous (%)                              | 19 (34,6)                |
| Cardiovascular disease history            |                          |
| Previous AMI (%) <sup>c</sup>             | 6 (11.1)                 |
| Previous stroke (%) <sup>d</sup>          | 3 (5,4)                  |
| Previous angina (%) <sup>a</sup>          | 2 (3,6)                  |
| Diabetes mellitus (%) <sup>d</sup>        | 3 (5,4)                  |
| Hypertension (%) <sup>a</sup>             | 31 (54,4)                |
| Killip class <sup>a</sup>                 |                          |
| I                                         | 40 (70,2)                |
| II                                        | 13 (22,8)                |
| III                                       | 4 (7,0)                  |
| IV                                        | 0(0)                     |

<sup>a</sup> 1 missing<sup>b</sup> 6 missing<sup>c</sup> 4 missing<sup>d</sup> 2 missing

AMI = acute myocardial infarction, TS = Takotsubo syndrome.

Table 2 Distribution of healthcare encounters and costs after TS, by type of healthcare providers.

| Type of healthcare provider                                    | Inpatient care |                        |                           | Outpatient care |                        |                           | Primary care |               |                           | All care                                  |                          |                           |
|----------------------------------------------------------------|----------------|------------------------|---------------------------|-----------------|------------------------|---------------------------|--------------|---------------|---------------------------|-------------------------------------------|--------------------------|---------------------------|
|                                                                | No.            | Unit cost EUR (95%CI)  | Total cost EUR (% of all) | No.             | Unit cost EUR (95%CI)  | Total cost EUR (% of all) | No.          | Unit cost EUR | Total cost EUR (% of all) | No.                                       | Average cost per patient | Total cost EUR (% of all) |
| Physician, visit                                               |                |                        |                           | 214             | 282<br>(243-320)       | 60,295 (10.0)             | 109          | 149           | 16,275 (2.7)              | 323                                       | 1,320                    | 76,570<br>(12.7)          |
| Physician, indirect encounter                                  |                |                        |                           | 5               | 0 <sup>b</sup>         | 0                         | 16           | 50            | 796 (0.1)                 | 21                                        | 14                       | 796 (0.1)                 |
| Nurse, visit                                                   |                |                        |                           | 119             | 255<br>(225-285)       | 30,389 (5.1)              | 93           | 58            | 5,368 (0.9)               | 212                                       | 616                      | 35,757<br>(6.0)           |
| Physiotherapist and occupational therapist, visit              |                |                        |                           | 191             | 87<br>(82-93)          | 16,707 (2.8)              | 19           | 46            | 875 (0.1)                 | 210                                       | 303                      | 17,582<br>(2.9)           |
| Physiotherapist and occupational therapist, indirect encounter |                |                        |                           |                 |                        |                           | 26           | 46            | 1,198 (0.2)               | 26                                        | 21                       | 1,198<br>(0.2)            |
| Other visit                                                    |                |                        |                           | 67              | 123<br>(99-147)        | 8,244 (1.4)               | 35           | 60            | 2,090 (0.3)               | 112                                       | 178                      | 10,334<br>(1.7)           |
| Hospitalization                                                | 98             | 4,391<br>(3,743-5,040) | 430,362 (71.6)            |                 |                        |                           |              |               |                           | 98                                        | 7,420                    | 430,362<br>(71.6)         |
| Index admission <sup>a</sup>                                   | 58             | 4,494<br>(4,134-4,853) | 260,623 (43.4)            |                 |                        |                           |              |               |                           | 58                                        | 4,494                    | 260,623<br>(43.4)         |
| Re-admissions                                                  | 40             | 4,243<br>(2,724-5,763) | 169,739 (28.2)            | 8               | 3,535<br>(2,893-4,176) | 28,276 (4.7)              |              |               |                           | 48                                        | 3,418                    | 198,015<br>(33.0)         |
| <b>Total cost</b>                                              | <b>98</b>      |                        | <b>430,362 (71.6)</b>     | <b>604</b>      |                        | <b>143,911 (24.0)</b>     | <b>298</b>   |               | <b>26,602 (4.4)</b>       | <b>902<sup>c</sup><br/>98<sup>d</sup></b> | <b>10,360</b>            | <b>600,876 (100)</b>      |

Number of encounters and mean unit costs by cost components among 58 patients during the six months after diagnosis of TS

<sup>a</sup>Data missing for two patients. Cost was calculated based on length of stay and median cost per day for the other participants' index hospitalization

<sup>b</sup>Zero cost assigned due to lack of both registered diagnosis and diagnosis related group.

<sup>c</sup> Outpatient and primary care contacts

<sup>d</sup> Hospitalisations

TS = Takotsubo syndrome

Table 3: Mean direct healthcare costs after TS, by person characteristics.

| Patient characteristics                    | No.<br>N = 58 | Mean cost<br>EUR (95% CI)    |
|--------------------------------------------|---------------|------------------------------|
| Sex                                        |               |                              |
| Women                                      | 53            | 9,907 (7,815-11,999)         |
| Men                                        | 5             | 15,161 (6,268-24,054)        |
| Age                                        |               |                              |
| Below 65 years                             | 20            | 9,711 (6,446-12,976)         |
| 65-75 years                                | 24            | 11,724 (8,167-15,282)        |
| 75 years or older                          | 14            | 8,948 (6,142-11,754)         |
| Country of birth                           |               |                              |
| Sweden                                     | 49            | 10,426 (8,336-12,517)        |
| Other                                      | 8             | 10,071 (3,381-16,762)        |
| Education <sup>a</sup>                     |               |                              |
| Upper secondary school                     | 33            | 11,296 (8,301-14,291)        |
| Post-secondary school                      | 24            | 9,112 (6,262-11,962)         |
| Nicotine use <sup>b</sup>                  |               |                              |
| No current or previous use                 | 28            | 10,091 (7,040-13,142)        |
| Current or previous use                    | 30            | 10,611 (8,015-13,206)        |
| Disease history <sup>a</sup>               |               |                              |
| Previous heart attack, angina or stroke    | 10            | 9,480 (6,134-12,825)         |
| No previous heart attack, angina or stroke | 48            | 10,543 (8,157-12,930)        |
| Comorbidity <sup>a</sup>                   |               |                              |
| Hypertension                               | 31            | 9,860 (7,388-12,331)         |
| No hypertension                            | 26            | 10,969 (7,556-14,383)        |
| <b>Total</b>                               | <b>58</b>     | <b>10,360 (8,310-12,409)</b> |

<sup>a</sup> 1 missing

<sup>b</sup> 6 missing

TS = Takotsubo syndrome

Table 4 Total costs for healthcare encounters among 58 patients, categorised by main conditions for each encounter, during six months after diagnosis with TS.

| ICD chapter and sub-chapter <sup>a</sup>                                                                   | Costs by chapters |                         | Costs by sub-chapters <sup>b</sup> |                         |
|------------------------------------------------------------------------------------------------------------|-------------------|-------------------------|------------------------------------|-------------------------|
|                                                                                                            | Total cost        | Mean cost per encounter | Total cost                         | Mean cost per encounter |
|                                                                                                            | EUR               | EUR (95% CI)            | EUR                                | EUR (95% CI)            |
| I Certain infectious and parasitic diseases (A00-B99)                                                      | 448               | 149 (-)                 |                                    |                         |
| II Neoplasms (C00-D48)                                                                                     | 25,557            | 1,065 (4-2,126)         |                                    |                         |
| III Blood and blood-forming organs diseases and certain disorders involving the immune mechanism (D50-D89) | 207               | 104 (38-169)            |                                    |                         |
| IV Endocrine, nutritional and metabolic diseases (E00-E90)                                                 | 6,599             | 347 (11-684)            |                                    |                         |
| V Mental and behavioural disorders (F00-F99)                                                               | 36,206            | 647 (-197-1,490)        |                                    |                         |
| VI Nervous system diseases (G00-G99)                                                                       | 5,980             | 460 (216-704)           |                                    |                         |
| VII Eye and adnexa diseases (H00-H59)                                                                      | 1,088             | 109 (44-174)            |                                    |                         |
| VIII Ear and mastoid process diseases (H60-H95)                                                            | 739               | 246 (169-324)           |                                    |                         |
| IX Circulatory system diseases (I00-I99)                                                                   | 413,841           | 1,019 (823-1,215)       |                                    |                         |
| IX 3 (I1-I159)                                                                                             |                   |                         | 6,811                              | 184 (77-291)            |
| IX 5 (I21-I219, I200, and I209)                                                                            |                   |                         | 32,876                             | 2,055 (1,090-3,020)     |
| IX 9 (I25-I259)                                                                                            |                   |                         | 7,722                              | 106 (55-156)            |
| IX 11 (I3-I399)                                                                                            |                   |                         | 381                                | 381 (-)                 |
| IX 12 (I40-I419 and I43-I499)                                                                              |                   |                         | 18,914                             | 822 (201-1,443)         |
| IX 13 (I42-I429)                                                                                           |                   |                         | 268,632                            | 1,272 (1,011-1,533)     |
| IX 14 (I5-I599)                                                                                            |                   |                         | 52,138                             | 1,448 (728-2,169)       |
| IX 15 (I60-I999)                                                                                           |                   |                         | 25,368                             | 3,171 (-1,973-8,315)    |
| X Respiratory system diseases (J00-J99)                                                                    | 29,002            | 806 (374-1,237)         |                                    |                         |
| XI Digestive system diseases (K00-K93)                                                                     | 5,173             | 1,293 (208-2,378)       |                                    |                         |
| XII Skin and subcutaneous tissue diseases (L00-L99)                                                        | 1,121             | 224 (171-277)           |                                    |                         |
| XIII Musculoskeletal system and connective tissue diseases (M00-M99)                                       | 14,166            | 354 (137-571)           |                                    |                         |
| XIV Genitourinary system diseases (N00-N99)                                                                | 579               | 97 (47-146)             |                                    |                         |
| XVIII Symptoms, signs and abnormal clinical and laboratory findings, not elsewhere classified (R00-R99)    | 15,106            | 321 (210-433)           |                                    |                         |
| XIX Injury, poisoning and certain other consequences of external causes (S00-T98)                          | 4,359             | 363 (-182-908)          |                                    |                         |
| XXI Factors influencing health status and contact with health services (Z00-Z99)                           | 30,060            | 423 (264-583)           |                                    |                         |
| XXII Codes for special purposes (U00-U99)                                                                  | 3,915             | 186 (170-202)           |                                    |                         |
| Not registered                                                                                             | 6,731             | 30 (26-34)              |                                    |                         |
| <b>Total cost</b>                                                                                          | <b>600,876</b>    |                         |                                    |                         |
| Of which at least one condition was in chapter IX <sup>c</sup> (% of total cost)                           | 465,493 (77.5)    |                         |                                    |                         |
| Of which the main condition was in chapter IX (% of total cost)                                            | 413,841 (68.9)    |                         |                                    |                         |

1  
2  
3  
4  
5 <sup>a</sup>No costs were associated with the omitted chapters and subchapters.  
6

7 <sup>b</sup>Only specified for ICD chapter IX Circulatory system diseases.  
8

9 <sup>c</sup>At least one condition in chapter IX 3: EUR 176,829; IX 5: EUR 62,397; IX 9: EUR 41,120; IX 11: EUR 4,678; IX 12: EUR 51,190; IX 13: EUR 304,623; IX 14: EUR  
10 117,898; IX 15: EUR 42,600. Costs for a specific visit may be included in the sum for more than one subchapter.  
11

12  
13 TS = Takotsubo syndrome  
14  
15  
16  
17  
18  
19  
20  
21  
22  
23  
24  
25  
26  
27  
28  
29  
30  
31  
32  
33  
34  
35  
36  
37  
38  
39  
40  
41  
42  
43  
44  
45  
46

For peer review only

## DISCUSSION

These findings indicate that the initial hospitalization represents only 2/5 of the direct healthcare costs during the six months following diagnosis with TS. Additional costs were incurred by readmissions, often for circulatory system disorders (including TS), and an average of more than 15 additional healthcare visits per patient during the period. Overall, circulatory system disorders were the main condition in healthcare encounters corresponding to almost 70% of all costs in this patient population.

We found little difference in cost of care related to age, country of birth, and present or previous smoking behaviour. Patients with previous diagnoses of AMI, angina, stroke, or hypertension had lower costs of care than those without but the differences were small and these results may not be generalizable to the population. Men had higher costs of care than women, but as only five men participated, this result should be viewed with caution and may not be reflected in a larger cohort. However, previous reports suggest that men suffer from more complications,<sup>9</sup> and this may be reflected in the higher cost of care in our study. Despite the small number of men in the sample, the proportion and age are similar to that of larger cohorts.<sup>2 19</sup> The proportion of patients with diabetes mellitus was lower than in previous studies,<sup>6 20</sup> but similar to that of a larger Swedish cohort,<sup>4</sup> and this may have affected the total cost of care.

The total average length of hospital stay during study period was 10.2 days, the index hospitalization constituted 6.4 days of this. Previous studies have reported average hospital stays of 3.6–8 days for the index hospitalization.<sup>9 10 21</sup> Average length of stay in hospital decreased from 4.3 to 3.8 days between 2007 and 2012.<sup>21</sup> In Sweden, the median hospital stay for patients <80 years old, who were discharged alive after an AMI, was 4 days in 2015. This had not changed since 2008.<sup>22</sup> Common procedures during the hospitalisation were coronary angiography, Doppler echocardiogram, conventional ECG and oesophageal ECG.

In the current study, we found that the total average healthcare cost per patient from hospitalization to six months after discharge for TS was EUR 10,360, the equivalent of USD 11,491, of which less than half the costs (43.4 %) were incurred during the index hospitalisation. This was not in line with the calculated average cost of USD 16,723 for only hospitalization found by Khera et al.<sup>9</sup> The large discrepancy in cost may be due to organizational differences between the health systems in Europe and the US. The divergence between reported costs for TS hospitalizations in the previous two studies<sup>9 10</sup> may be because of the difference between costs and charges in those two studies, as cost-to-charge ratios can vary between 0.12 and 0.96.<sup>23</sup>

There were 40 readmissions during the 6 months after initial discharge, 11 of which were during the first 30 days. This equals a 30-day readmission rate of 19%, which is higher than the 11.6% that has previously been reported for patients with TS.<sup>21</sup> No data on the six month or one year (all-cause) re-admission rate of patients with TS could be found but the readmission rate in Sweden one year after an AMI was 35% for females 65–75 years old and 28% for females 0–64 years old. Approximately half of these were for non-cardiovascular causes.<sup>22</sup> The readmission rate for patients with TS in this study is comparable (34,5%) but in half the time. The proportion of non-cardiovascular causes for readmission was also similar in the current study, 21 of 40 readmissions had a non-cardiovascular main diagnosis. This indicates that health is affected after TS, which is in line with previous studies.<sup>24</sup>



1  
2  
3 <sup>25</sup> There is a large potential for cost savings if the re-admission rate can be reduced, even if this  
4 means increasing the number of outpatient and primary care visits. In the current study, the cost for  
5 the re-admissions (EUR 169,739) was equivalent to the total cost of all outpatient and primary care  
6 encounters combined (EUR 170,514).  
7  
8

9 In our study, most costs originated from ICD chapter IX (I00–I99 Circulatory system diseases) and  
10 most of these costs related to subchapter I42–I49, which is where TS is usually diagnosed. There is no  
11 specific ICD-code for TS in the Swedish version of ICD 10 (in some countries it is categories as  
12 I51.81, according to ICD-10-CM coding practices). This indicates that much of the care that these  
13 patients utilize relates to TS or other cardiovascular diseases. Other main conditions that rendered  
14 substantial costs originated from ICD chapters II (C00–D48 Neoplasms), V (F00–F99 Mental and  
15 behavioural disorders), and X (J00–J99 Respiratory system diseases). These costs are expected if one  
16 considers previously reported comorbidities for TS. Other TS comorbidities are neurologic, renal, and  
17 endocrine diseases, but there were small concurrent costs for these conditions in this sample.<sup>6 20</sup>  
18  
19  
20

21 Studies mapping resource use and costs related to a disease are commonly called COI studies. COI  
22 studies are often criticised for the lack of comparison between different healthcare programmes,  
23 thus of less use in decision making. Although insufficient to provide guidance on treatment choices,  
24 descriptive COI estimates can be used to understand the magnitude of the disease in relation to  
25 other diagnoses, and to identify patient groups for prioritizing research and the development of  
26 intervention programmes.<sup>11 26 27</sup> In a disease like TS, where the preconception has been that the  
27 disease is relatively benign,<sup>4 8</sup> and where follow up guidelines are lacking,<sup>2</sup> COI can be a useful tool for  
28 putting the disease in perspective to other diagnoses.<sup>11</sup> Furthermore, studies on the utilization of  
29 healthcare resources after initial discharge from hospital are needed, as the health system and  
30 availability of, for example, specialized outpatient care will greatly affect the length of initial  
31 hospitalization.  
32  
33  
34  
35

36 It appears from the results in this and previous studies that patients with TS have comparable  
37 readmission rates as well as mortality rates as patients with AMI.<sup>4 8</sup> Together, these results indicate  
38 that the healthcare of TS patients need to be further developed, including a follow up programme.  
39 Recent studies evaluating a person-centred intervention from hospital to primary care for patients  
40 with acute coronary syndrome found a significant increase in self-efficacy in the intervention-group  
41 that was sustainable up to two years.<sup>28 29</sup> Follow-up programs focusing the patient as a person with  
42 needs and abilities have proved efficient by for example reducing readmissions to hospital also in  
43 patients with severe chronic heart failure.<sup>30 31</sup> Previous studies have also shown that patients with TS  
44 often have persisting symptoms, such as pain, fatigue and shortness of breath, for as long as four  
45 years after discharge<sup>24 25 32</sup> and would therefore probably benefit from this kind of supportive follow-  
46 up program.  
47  
48  
49  
50

## 51 **Methodological discussion**

52 The main strengths of this study was the comprehensive data on resource use available in the VEGA  
53 database and medical records, thus making follow-up feasible also after the initial hospitalization.  
54 The study was however limited by the small sample of patients, which was related both to the  
55 regional demarcation of the VEGA database (thus making inclusion of patients from other regions  
56 impossible) and by the set inclusion and exclusion criteria; only patients that had undergone  
57 coronary angiography were included (as the lack of a specific ICD-code for TS in the Swedish version  
58  
59  
60

of ICD 10, makes identification of TS more difficult), and patients with a predicted survival of less than 6 months were excluded from the study. Both factors may also influence utilization of care, and its accompanying costs. Costs were calculated based on template costs i.e., the DRG weights and an average cost per DRG, and weighted costs from national statistics for primary care visits. These results are proxies for the actual healthcare costs, and calculations like these are used nationally to compare costs between e.g., counties. The estimated costs should thus include the burden to the healthcare system of standard treatments and examinations during healthcare encounters, but may to some extent fail to cover unusual healthcare interventions. Finally, the study was limited to six months after diagnosis, thus increasing the follow-up compared to previous studies in this field but still neglecting costs occurring during later stages of the TS disease. This study period is, however, expected to cover most resource use related to TS, as the cardiac function usually recovers within that period.<sup>2</sup> The study should be viewed as a first step towards a more comprehensive understanding of the economic burden of TS to the health system. Future studies are thus warranted of the long-term economic outcomes after TS. The introduction of a specific ICD-code for TS in the Swedish version of ICD is also needed and would make research easier and more reliable.

## CONCLUSION

The current study shows that healthcare costs from hospitalization to six months after discharge for TS primarily relate to a cardiac condition. Although there is frequent encounter with outpatient clinics and primary care, most costs stem from hospitalizations, of which readmissions contributed substantially to the total cost. Patients with TS would probably benefit from a supportive follow-up program after discharge from hospital.

## AUTHORS' CONTRIBUTIONS

SW and HG contributed to design and planning of the study, conducting and analyzing the data, and writing and reviewing the manuscript. IE, KU and EO contributed to designing and planning the study, and writing and reviewing the manuscript.

## DATA SHARING STATEMENT

All data relevant to the study are included in the article or uploaded as supplementary information

## FUNDING

This work was supported by the Centre for Person-Centred Care (GPCC), University of Gothenburg, Sweden. GPCC is funded by the Swedish Government's grant for Strategic Research Areas, Care Sciences (Application to Swedish Research Council no. 2009-1088) and co-funded by the University of Gothenburg, Sweden. It was also supported in accordance to the Swedish agreement between the government and the county councils concerning economic support for providing an infrastructure for research and education of doctors (ALF). Swedish Heart and Lung Association (E093/13, E088/14 and E127/15), the Emelle Fund (161/14) and, the Royal and Hvitfeldtska Foundation also contributed to the funding of the study.

## DECLARATION OF CONFLICTING INTRESTS

Elmir Omerovic reports grants and personal fees from AstraZeneca, grants from Abbott, outside the submitted work. Sara Wallström, Inger Ekman, Kerstin Ulin and Hanna Gyllensten have no conflicts of interest to report.

## REFERENCES

1. Bybee KA, Kara T, Prasad A, et al. Systematic review: transient left ventricular apical ballooning: a syndrome that mimics ST-segment elevation myocardial infarction. *Ann Intern Med* 2004;141(11):858-65. [published Online First: 2004/12/08]
2. Lyon AR, Bossone E, Schneider B, et al. Current state of knowledge on Takotsubo syndrome: a Position Statement from the Taskforce on Takotsubo Syndrome of the Heart Failure Association of the European Society of Cardiology. *Eur J Heart Fail* 2016;18(1):8-27. doi: 10.1002/ejhf.424 [published Online First: 2015/11/10]
3. Pilgrim TM, Wyss TR. Takotsubo cardiomyopathy or transient left ventricular apical ballooning syndrome: A systematic review. *Int J Cardiol* 2008;124(3):283-92. doi: 10.1016/j.ijcard.2007.07.002 [published Online First: 2007/07/27]
4. Redfors B, Vedad R, Angeras O, et al. Mortality in takotsubo syndrome is similar to mortality in myocardial infarction - A report from the SWEDEHEART registry. *Int J Cardiol* 2015;185:282-9. doi: 10.1016/j.ijcard.2015.03.162 [published Online First: 2015/03/31]
5. Schultz T, Shao Y, Redfors B, et al. Stress-induced cardiomyopathy in Sweden: evidence for different ethnic predisposition and altered cardio-circulatory status. *Cardiology* 2012;122(3):180-6. doi: 10.1159/000338814 [published Online First: 2012/08/01]
6. El-Sayed AM, Brinjikji W, Salka S. Demographic and co-morbid predictors of stress (takotsubo) cardiomyopathy. *Am J Cardiol* 2012;110(9):1368-72. doi: 10.1016/j.amjcard.2012.06.041 [published Online First: 2012/07/24]
7. Omerovic E. Takotsubo syndrome: not as benign as once believed. *Eur J Heart Fail* 2016;18(6):657-9. doi: 10.1002/ejhf.555 [published Online First: 2016/05/03]
8. Stiermaier T, Moeller C, Oehler K, et al. Long-term excess mortality in takotsubo cardiomyopathy: predictors, causes and clinical consequences. *Eur J Heart Fail* 2016;18(6):650-6. doi: 10.1002/ejhf.494 [published Online First: 2016/03/19]
9. Khera R, Light-McGroary K, Zahr F, et al. Trends in hospitalization for takotsubo cardiomyopathy in the United States. *Am Heart J* 2016;172:53-63. doi: 10.1016/j.ahj.2015.10.022 [published Online First: 2016/02/10]
10. Pant S, Deshmukh A, Mehta K, et al. Burden of arrhythmias in patients with Takotsubo cardiomyopathy (apical ballooning syndrome). *Int J Cardiol* 2013;170(1):64-8. doi: 10.1016/j.ijcard.2013.10.041 [published Online First: 2013/11/12]
11. Tarricone R. Cost-of-illness analysis. What room in health economics? *Health Policy* 2006;77(1):51-63. doi: 10.1016/j.healthpol.2005.07.016 [published Online First: 2005/09/06]
12. Osika Friberg I, Krantz G, Maatta S, et al. Sex differences in health care consumption in Sweden: A register-based cross-sectional study. *Scandinavian journal of public health* 2016;44(3):264-73. doi: 10.1177/1403494815618843 [published Online First: 2015/12/10]
13. Bengtsson K, Jacobsson LTH, Rydberg B, et al. Comparisons between comorbid conditions and health care consumption in rheumatoid arthritis patients with or without biological disease-modifying anti-rheumatic drugs: a register-based study. *BMC Musculoskelet Disord* 2016;17 doi: 10.1186/s12891-016-1354-7
14. Wallerstedt SM, Bladh L, Ramsberg J. A cost-effectiveness analysis of an in-hospital clinical pharmacist service. *BMJ open* 2012;2(1)

15. Prisindex: Sveriges kommuner och landsting (SKL); 2016 [Available from: <http://skl.se/ekonomijuridikstatistik/ekonomi/budgetochplanering/prisindex.1331.html> accessed 20160701.
16. Statistik om hälso- och sjukvård samt regional utveckling 2014 Stockholm: Sveriges kommuner och landsting (SKL) 2015.
17. Annual average exchange rate (aggregate): Sveriges Riksbank; 2016 [Available from: <http://www.riksbank.se/en/Interest-and-exchange-rates/Annual-aggregate-Exchange-rates/> accessed 1021 2016.
18. Thompson SG, Barber JA. How should cost data in pragmatic randomised trials be analysed? *BMJ* 2000;320(7243):1197-200.
19. Templin C, Ghadri JR, Diekmann J, et al. Clinical Features and Outcomes of Takotsubo (Stress) Cardiomyopathy. *N Engl J Med* 2015;373(10):929-38. doi: 10.1056/NEJMoa1406761 [published Online First: 2015/09/04]
20. Pelliccia F, Parodi G, Greco C, et al. Comorbidities frequency in Takotsubo syndrome: an international collaborative systematic review including 1109 patients. *Am J Med* 2015;128(6):654.e11-9. doi: 10.1016/j.amjmed.2015.01.016 [published Online First: 2015/02/11]
21. Murugiah K, Wang Y, Desai NR, et al. Trends in Short- and Long-Term Outcomes for Takotsubo Cardiomyopathy Among Medicare Fee-for-Service Beneficiaries, 2007 to 2012. *JACC Heart failure* 2016;4(3):197-205. doi: 10.1016/j.jchf.2015.09.013 [published Online First: 2016/01/10]
22. SWEDEHEART Annual report 2015. Uppsala: Uppsala Clinical Research Center (UCR), 2016.
23. Center RDA. Calculating Cost: Cost-to-Charge Ratios 2013 [Available from: <http://www.resdac.org/media/calculating-cost-cost-charge-ratios> accessed 0812 2016.
24. Wallstrom S, Ulin K, Omerovic E, et al. Self-reported symptoms 8weeks after discharge: A comparison of takotsubo syndrome and myocardial infarction. *Int J Cardiol* 2016;224:348-52. doi: 10.1016/j.ijcard.2016.09.052 [published Online First: 2016/10/25]
25. Wallstrom S, Ulin K, Omerovic E, et al. Symptoms in patients with takotsubo syndrome: a qualitative interview study. *BMJ open* 2016;6(10):e011820. doi: 10.1136/bmjopen-2016-011820 [published Online First: 2016/10/07]
26. Rice DP. Cost of illness studies: what is good about them? *Inj Prev* 2000;6(3):177-9. [published Online First: 2000/09/26]
27. Oxman AD, Fretheim A, Lavis JN, et al. SUPPORT Tools for evidence-informed health Policymaking (STP) 12: Finding and using research evidence about resource use and costs. *Health Research Policy and Systems* 2009;7(Suppl 1):S12. doi: 10.1186/1478-4505-7-s1-s12
28. Fors A, Ekman I, Taft C, et al. Person-centred care after acute coronary syndrome, from hospital to primary care - A randomised controlled trial. *Int J Cardiol* 2015;187:693-9. doi: 10.1016/j.ijcard.2015.03.336 [published Online First: 2015/04/29]
29. Fors A, Swedberg K, Ulin K, et al. Effects of person-centred care after an event of acute coronary syndrome: Two-year follow-up of a randomised controlled trial. *Int J Cardiol* 2017;249:42-47. doi: 10.1016/j.ijcard.2017.08.069 [published Online First: 2017/09/13]
30. Hansson E, Ekman I, Swedberg K, et al. Person-centred care for patients with chronic heart failure - a cost-utility analysis. *Eur J Cardiovasc Nurs* 2016;15(4):276-84. doi: 10.1177/1474515114567035 [published Online First: 2015/01/18]
31. Sahlen KG, Boman K, Brannstrom M. A cost-effectiveness study of person-centered integrated heart failure and palliative home care: Based on a randomized controlled trial. *Palliat Med* 2016;30(3):296-302. doi: 10.1177/0269216315618544 [published Online First: 2015/11/26]
32. Elesber AA, Prasad A, Lennon RJ, et al. Four-year recurrence rate and prognosis of the apical ballooning syndrome. *J Am Coll Cardiol* 2007;50(5):448-52. doi: 10.1016/j.jacc.2007.03.050 [published Online First: 2007/07/31]

**STROBE 2007 (v4) Statement—Checklist of items that should be included in reports of cohort studies**

| Section/Topic                | Item # | Recommendation                                                                                                                                                                       | Reported on page # |
|------------------------------|--------|--------------------------------------------------------------------------------------------------------------------------------------------------------------------------------------|--------------------|
| <b>Title and abstract</b>    | 1      | (a) Indicate the study’s design with a commonly used term in the title or the abstract                                                                                               | 2                  |
|                              |        | (b) Provide in the abstract an informative and balanced summary of what was done and what was found                                                                                  | 2                  |
| <b>Introduction</b>          |        |                                                                                                                                                                                      |                    |
| Background/rationale         | 2      | Explain the scientific background and rationale for the investigation being reported                                                                                                 | 4+5                |
| Objectives                   | 3      | State specific objectives, including any prespecified hypotheses                                                                                                                     | 4+5                |
| <b>Methods</b>               |        |                                                                                                                                                                                      |                    |
| Study design                 | 4      | Present key elements of study design early in the paper                                                                                                                              | 5-7                |
| Setting                      | 5      | Describe the setting, locations, and relevant dates, including periods of recruitment, exposure, follow-up, and data collection                                                      | 5-7                |
| Participants                 | 6      | (a) Give the eligibility criteria, and the sources and methods of selection of participants. Describe methods of follow-up                                                           | 5-7                |
|                              |        | (b) For matched studies, give matching criteria and number of exposed and unexposed                                                                                                  | n/a                |
| Variables                    | 7      | Clearly define all outcomes, exposures, predictors, potential confounders, and effect modifiers. Give diagnostic criteria, if applicable                                             | 5-7                |
| Data sources/<br>measurement | 8*     | For each variable of interest, give sources of data and details of methods of assessment (measurement). Describe comparability of assessment methods if there is more than one group | 5-7                |
| Bias                         | 9      | Describe any efforts to address potential sources of bias                                                                                                                            | 19+20              |
| Study size                   | 10     | Explain how the study size was arrived at                                                                                                                                            | 5-7                |
| Quantitative variables       | 11     | Explain how quantitative variables were handled in the analyses. If applicable, describe which groupings were chosen and why                                                         | 5-7                |
| Statistical methods          | 12     | (a) Describe all statistical methods, including those used to control for confounding                                                                                                | 6+7                |
|                              |        | (b) Describe any methods used to examine subgroups and interactions                                                                                                                  | n/a                |
|                              |        | (c) Explain how missing data were addressed                                                                                                                                          | 5-7                |
|                              |        | (d) If applicable, explain how loss to follow-up was addressed                                                                                                                       | 5-7                |
|                              |        | (e) Describe any sensitivity analyses                                                                                                                                                | n/a                |
| <b>Results</b>               |        |                                                                                                                                                                                      |                    |

|                          |     |                                                                                                                                                                                                                                                                                                                                                                                                               |                    |
|--------------------------|-----|---------------------------------------------------------------------------------------------------------------------------------------------------------------------------------------------------------------------------------------------------------------------------------------------------------------------------------------------------------------------------------------------------------------|--------------------|
| Participants             | 13* | (a) Report numbers of individuals at each stage of study—eg numbers potentially eligible, examined for eligibility, confirmed eligible, included in the study, completing follow-up, and analysed<br>(b) Give reasons for non-participation at each stage<br>(c) Consider use of a flow diagram                                                                                                               | 5-7<br>5-7<br>-    |
| Descriptive data         | 14* | (a) Give characteristics of study participants (eg demographic, clinical, social) and information on exposures and potential confounders<br>(b) Indicate number of participants with missing data for each variable of interest<br>(c) Summarise follow-up time (eg, average and total amount)                                                                                                                | 8-11<br>5-7<br>n/a |
| Outcome data             | 15* | Report numbers of outcome events or summary measures over time                                                                                                                                                                                                                                                                                                                                                | 8-15               |
| Main results             | 16  | (a) Give unadjusted estimates and, if applicable, confounder-adjusted estimates and their precision (eg, 95% confidence interval). Make clear which confounders were adjusted for and why they were included<br>(b) Report category boundaries when continuous variables were categorized<br>(c) If relevant, consider translating estimates of relative risk into absolute risk for a meaningful time period | 8-15<br>n/a<br>n/a |
| Other analyses           | 17  | Report other analyses done—eg analyses of subgroups and interactions, and sensitivity analyses                                                                                                                                                                                                                                                                                                                | n/a                |
| <b>Discussion</b>        |     |                                                                                                                                                                                                                                                                                                                                                                                                               |                    |
| Key results              | 18  | Summarise key results with reference to study objectives                                                                                                                                                                                                                                                                                                                                                      | 16-20              |
| <b>Limitations</b>       |     |                                                                                                                                                                                                                                                                                                                                                                                                               |                    |
| Interpretation           | 20  | Give a cautious overall interpretation of results considering objectives, limitations, multiplicity of analyses, results from similar studies, and other relevant evidence                                                                                                                                                                                                                                    | 16-20              |
| Generalisability         | 21  | Discuss the generalisability (external validity) of the study results                                                                                                                                                                                                                                                                                                                                         | 16-20              |
| <b>Other information</b> |     |                                                                                                                                                                                                                                                                                                                                                                                                               |                    |
| Funding                  | 22  | Give the source of funding and the role of the funders for the present study and, if applicable, for the original study on which the present article is based                                                                                                                                                                                                                                                 | 20+21              |

\*Give information separately for cases and controls in case-control studies and, if applicable, for exposed and unexposed groups in cohort and cross-sectional studies.

**Note:** An Explanation and Elaboration article discusses each checklist item and gives methodological background and published examples of transparent reporting. The STROBE checklist is best used in conjunction with this article (freely available on the Web sites of PLoS Medicine at <http://www.plosmedicine.org/>, Annals of Internal Medicine at <http://www.annals.org/>, and Epidemiology at <http://www.epidem.com/>). Information on the STROBE Initiative is available at [www.strobe-statement.org](http://www.strobe-statement.org).
